# Pharmacological Analysis of Ionotropic Glutamate Receptor Function in Neuronal Circuits of the Zebrafish Olfactory Bulb

Rico Tabor<sup>1</sup>, Rainer W. Friedrich<sup>1,2\*</sup>

1 Department of Biomedical Optics, Max-Planck-Institute for Medical Research, Heidelberg, Germany, 2 Friedrich-Miescher-Institute, Basel, Switzerland

Although synaptic functions of ionotropic glutamate receptors in the olfactory bulb have been studied *in vitro*, their roles in pattern processing in the intact system remain controversial. We therefore examined the functions of ionotropic glutamate receptors during odor processing in the intact olfactory bulb of zebrafish using pharmacological manipulations. Odor responses of mitral cells and interneurons were recorded by electrophysiology and 2-photon  $\text{Ca}^{2+}$  imaging. The combined blockade of AMPA/kainate and NMDA receptors abolished odor-evoked excitation of mitral cells. The blockade of AMPA/kainate receptors alone, in contrast, increased the mean response of mitral cells and decreased the mean response of interneurons. The blockade of NMDA receptors caused little or no change in the mean responses of mitral cells and interneurons. However, antagonists of both receptor types had diverse effects on the magnitude and time course of individual mitral cell and interneuron responses and, thus, changed spatio-temporal activity patterns across neuronal populations. Oscillatory synchronization was abolished or reduced by AMPA/kainate and NMDA receptor antagonists, respectively. These results indicate that (1) interneuron responses depend mainly on AMPA/kainate receptor input during an odor response, (2) interactions among mitral cells and interneurons regulate the total olfactory bulb output activity, (3) AMPA/kainate receptors participate in the synchronization of odor-dependent neuronal ensembles, and (4) ionotropic glutamate receptor-containing synaptic circuits shape odor-specific patterns of olfactory bulb output activity. These mechanisms are likely to be important for the processing of odor-encoding activity patterns in the olfactory bulb.

Citation: Tabor R, Friedrich RW (2008) Pharmacological Analysis of Ionotropic Glutamate Receptor Function in Neuronal Circuits of the Zebrafish Olfactory Bulb. PLoS ONE 3(1): e1416. doi:10.1371/journal.pone.0001416

## INTRODUCTION

The first olfactory processing center in vertebrates, the olfactory bulb, transforms odor-specific patterns of sensory inputs across the array of glomeruli into spatio-temporal patterns of activity across the output neurons, the mitral cells. Processing of activity patterns in the olfactory bulb reduces the overlap between representations of related odors [1–3], rhythmically synchronizes odor-dependent ensembles of mitral cells [1,4–6], and is likely to be important for additional computations involved in the analysis of an animal's molecular environment. The mechanistic basis of pattern processing in the olfactory bulb, however, is poorly understood.

The synaptic architecture of neuronal circuits in the olfactory bulb is conserved across vertebrate classes [7,8]. Within the sensory input modules of the olfactory bulb, the glomeruli, mitral cells can excite one another via gap junctions and fast volume transmission of glutamate [9–12]. Across glomeruli, synaptic interactions are mediated by interneurons, predominantly periglomerular and granule cells. Interactions among neurons associated with different glomeruli occur via various synaptic pathways that extend over multiple spatial scales and exert predominantly inhibitory effects on olfactory bulb output neurons [13,14] (Fig. 1). The most prominent inter-glomerular synaptic pathway is the mitral cell→interneuron→mitral cell pathway, where periglomerular or granule cells are excited by glutamatergic mitral cell→interneuron synapses and feed back GABAergic inhibition onto the same and other mitral cells at interneuron→mitral cell synapses. This and other pathways (Fig. 1) shape spatio-temporal patterns of olfactory bulb output activity and may thereby optimize odor representations for processing in higher brain regions.

Experiments in brain slices have demonstrated that the activation of GABA release from interneurons can depend on NMDA receptor input [15,16]. Glutamate release from mitral cells

can cause long-lasting inhibitory  $\text{GABA}_A$  receptor currents in the same mitral cell even in the absence of action potential firing [15–17], partly by direct coupling of  $\text{Ca}^{2+}$  influx through the NMDA receptor to GABA release at the reciprocal dendro-dendritic synapse [18–20]. This mechanism is thought to mediate recurrent inhibition of the same presynaptic mitral cells because synaptic  $\text{Ca}^{2+}$  transients in granule cells are local events [21]. Strong inputs to interneurons trigger  $\text{Na}^+$  or  $\text{Ca}^{2+}$  action potentials that invade large portions of the dendritic tree and probably mediate inter-glomerular lateral inhibition among multiple mitral cells [21–23]. The relative strength of these different modes of inhibition during an odor response, however, is unclear.

Despite detailed insights into the molecular and biophysical properties of olfactory bulb neurons and synapses it remains unclear how synaptic interactions shape the spatio-temporal

**Academic Editor:** Ernest Greene, University of Southern California, United States of America

**Received** November 13, 2007; **Accepted** December 2, 2007; **Published** January 9, 2008

**Copyright:** © 2008 Tabor, Friedrich. This is an open-access article distributed under the terms of the Creative Commons Attribution License, which permits unrestricted use, distribution, and reproduction in any medium, provided the original author and source are credited.

**Funding:** This work was supported by the Max-Planck-Society, the Novartis Research Foundation and the Deutsche Forschungsgemeinschaft (FOR 643).

**Competing Interests:** The authors have declared that no competing interests exist.

\* **To whom correspondence should be addressed.** E-mail: Rainer.Friedrich@fmi.ch

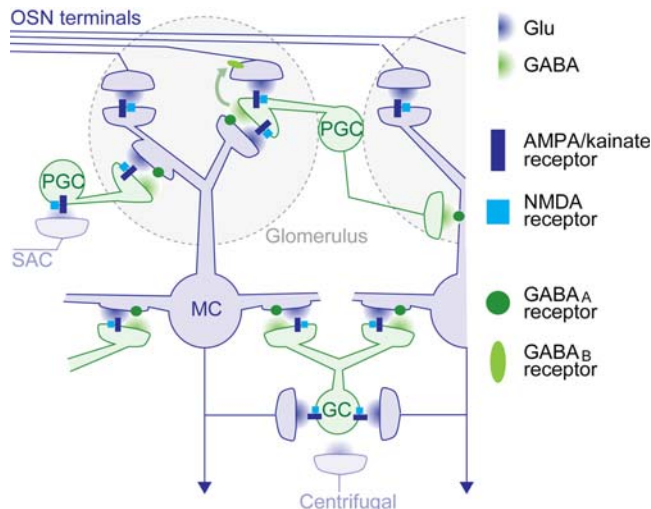

**Figure 1. Simplified architecture of synaptic pathways in the olfactory bulb.** Within glomeruli, glutamatergic olfactory sensory neurons provide excitatory synaptic input to mitral cells and a subpopulation of periglomerular cells via AMPA/kainate and NMDA receptors. Periglomerular cells also receive glutamatergic input from mitral cell dendrites and provide GABAergic output to mitral cells of the same and neighbouring glomeruli. In addition, GABA (green arrow) and dopamine (not shown) released from periglomerular cells reduces glutamate release from olfactory sensory neuron axon terminals by acting on GABA<sub>B</sub> and D<sub>2</sub> receptors, respectively, in the same glomerulus [23,49–53]. In subglomerular layers, glutamate release from mitral cell dendrites and axon collaterals stimulates granule cells via AMPA/kainate and NMDA receptors. Granule cells release GABA back onto GABA<sub>A</sub> receptors on the same and other mitral cells. Glutamate release from a mitral cell can therefore cause recurrent inhibition of the same mitral cell and lateral inhibition of other mitral cells via periglomerular and granule cells. These interactions, here collectively referred to as the mitral cell→interneuron→mitral cell pathway, can extend over distances corresponding to multiple glomeruli. An additional pathway mediating lateral inhibition that is not detailed in this scheme is the short axon cell (SAC)→periglomerular→mitral cell pathway identified in rodents [13,54]. Centrifugal inputs from higher brain areas are also not shown in detail. Many of these inputs terminate on interneurons and are glutamatergic. Not included in the scheme are metabotropic glutamate receptors, interactions among interneurons in the granule cell layer [55], glutamate spillover [56], and a small glutamatergic subpopulation of granule cells [57]. Strong excitatory interactions across glomeruli, as revealed in the antennal lobe of *Drosophila* [58–60], have not been found in the vertebrate olfactory bulb. Abbreviations: OSN: olfactory sensory neuron, PGC: periglomerular cell, MC: mitral cell, GC: granule cell, SAC: short axon cell.  
doi:10.1371/journal.pone.0001416.g001

structure of olfactory bulb output activity in the intact circuit. To address this question, we took advantage of a preparation of the entire zebrafish brain that permits the combination of odor stimulation, electrophysiology, functional imaging and pharmacology. We concentrated on the role of ionotropic glutamate receptors, which comprise AMPA/kainate and NMDA receptors. Both receptor types are coexpressed at the olfactory sensory neuron→mitral cell synapse and at mitral cell→interneuron synapses [14,24]. Hence, ionotropic glutamate receptors mediate most or all excitatory synaptic interactions among olfactory bulb neurons and are involved in multiple synaptic pathways (Fig. 1). While the combined blockade of AMPA/kainate and NMDA receptors abolished excitatory input to mitral cells, the selective blockade of each receptor type produced complex effects on the spatial and temporal patterning of olfactory bulb output activity. The results provide insights into the functions of synaptic circuits

in the intact olfactory bulb, including the regulation of the total output activity, the mechanisms of interneuron activation, and the oscillatory synchronization of neuronal ensembles.

## RESULTS

Mitral cells in the non-anesthetized olfactory bulb of zebrafish and other species exhibit pronounced fluctuations in membrane potential and fire spontaneous action potentials at irregular intervals. Odor stimulation causes stimulus- and mitral cell-dependent temporal modulations of firing frequency that can comprise successive excitatory and inhibitory epochs [2,4,25–28]. The population of mitral cells therefore responds to a given stimulus with a specific spatio-temporal pattern of activity. To analyze the role of glutamatergic synaptic interactions in this response, we pharmacologically manipulated AMPA/kainate and NMDA receptor function by bath-application of the selective antagonists 2,3-Dioxo-6-nitro-1,2,3,4-tetrahydropbenzo[*f*]quinoxaline-7-sulfonamide (NBQX; 5–10  $\mu$ M) and D(-)-2-Amino-5-phosphonopentanoic acid (AP5; 50–100  $\mu$ M), respectively. We first measured the effect on odor responses of mitral cells in an explant preparation of the adult zebrafish brain by loose-patch extracellular and whole cell intracellular recordings. The panel of odor stimuli comprised two food extracts and 6 individual amino acids, which are natural odors for aquatic animals. The amino acid concentration used (10  $\mu$ M) is in the intermediate physiological range and does not saturate glomerular odor responses in zebrafish [29].

### Combined blockade of AMPA and NMDA receptors

We first blocked all ionotropic glutamate receptors with NBQX and AP5. Spontaneous activity and odor responses were initially recorded for 15–20 min in the absence of drugs. Thereafter, NBQX and AP5 were washed in for 15 min and responses to the same stimuli were recorded again in the presence of the drugs. If recordings could be maintained for sufficient periods of time, drugs were washed out for at least 30 min and odor responses were measured again. The three recording conditions are designated “control”, “drug”, and “wash-out”, respectively.

In the presence of NBQX and AP5, spontaneous action potential firing was either completely abolished or became slow and periodic ( $n = 4$  mitral cells; Fig. 2A). Subthreshold membrane potential fluctuations were reduced or eliminated and spontaneous fluctuations in the local field potential were decreased (Fig. 2A, B). Odor stimulation failed to elicit mitral cell depolarization and action potential firing (Fig. 2A). Similar results were obtained in all mitral cells, each of which was stimulated with 1–2 amino acid odors or food extracts that elicited a strong response under control conditions. Moreover, odor-evoked local field potential oscillations were completely abolished (Fig. 2B, C, D). In the presence of NBQX and AP5, the power in the 15–30 Hz band of the local field potential was significantly reduced to  $4 \pm 1\%$  of control (t-test:  $P < 0.001$ ). These results show that glutamatergic synaptic transmission is essential for responses of olfactory bulb neurons to odors, most likely because glutamate is the neurotransmitter of olfactory sensory neurons [30,31].

### Blockade of AMPA/kainate receptors: effect on mitral cell responses

In contrast to the combined application of AMPA/kainate and NMDA receptor antagonists, the selective blockade of AMPA/kainate receptors by NBQX produced diverse effects on mitral cell activity. The spontaneous activity of individual mitral cells could decrease, remain similar, or even increase relative to control levels.

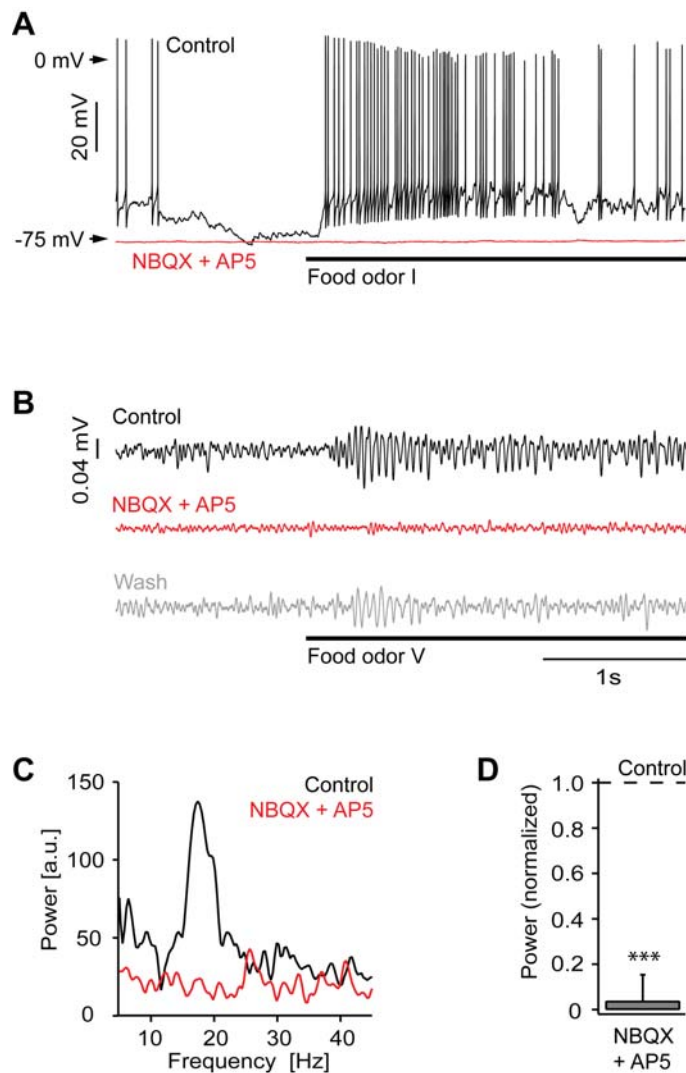

**Figure 2. Ionotropic glutamate receptors are essential for odor responses of mitral cells.** (A) Whole-cell recording from a mitral cell during odor stimulation (food extract; bar) before (black) and during (red) application of NBQX and AP5. (B) Local field potential recording during odor stimulation (food extract; bar) before (black) and during (red) application of NBQX and AP5 and after washout (gray). Traces are band-pass filtered between 8–43 Hz. (C) Power spectrum of local field potential traces (average of 6 trials; from unfiltered data) for the examples shown in (B). (D) Average local field potential power (15–30 Hz) in the presence of NBQX and AP5, normalized to control ( $n=4$  olfactory bulbs). \*\*\*,  $P<0.001$ . doi:10.1371/journal.pone.0001416.g002

On average, NBQX did not significantly change the spontaneous firing rate. Average spontaneous firing rates under control conditions and in the presence of NBQX were  $6.6 \pm 3.61$  Hz (mean  $\pm$  standard deviation) and  $5.51 \pm 4.90$  Hz, respectively (sign test:  $p=0.23$ ;  $n=13$  mitral cells). In most (5/6) mitral cells, steep subthreshold transients in the membrane potential were strongly reduced while slow fluctuations could still be observed (Fig. 3A).

All mitral cells were still odor-responsive in the presence of NBQX ( $n=22$  odor responses in 13 mitral cells; 1–3 different odors per mitral cell), but the magnitude and time course of odor responses was usually altered (Fig. 3A, B). Paradoxically, NBQX often enhanced transient periods of excitation shortly after response onset (Fig. 3B1–B3), while reductions in the amplitude of excitatory responses were rare. Inhibitory responses were prolonged in two cases (Fig. 3B4) and unchanged in one case. In two other cases, the sign of the response changed from an inhibition to a weak excitation (Fig. 3B5). In both of these cases, NBQX almost completely suppressed spontaneous activity.

Changes in the sign of the response from excitatory to inhibitory were not observed. The effects of NBQX were at least partially reversed after wash-out.

To quantify the effects of NBQX on odor responses we first compared the average odor-evoked firing rate change before and during NBQX treatment between 0.25 s and 0.75 s after response onset. On average, odor stimulation evoked an increase in mitral cell firing of  $4.0 \pm 9.7$  Hz above baseline under control conditions. This increase was significantly enhanced to  $11.5 \pm 18.9$  Hz by NBQX (sign test:  $P=0.02$ ; Fig. 4A). The cumulative distribution of response amplitudes was shifted to the right and saturated at higher frequencies (Fig. 4B), showing that smaller responses became less frequent and maximal response magnitudes were increased. However, not all responses were enhanced by NBQX and the effect of NBQX depended on the neuron and stimulus, suggesting that NBQX may also affect the pattern of activity across the population of mitral cells. We therefore compared responses of different mitral cells to different odors before and during application

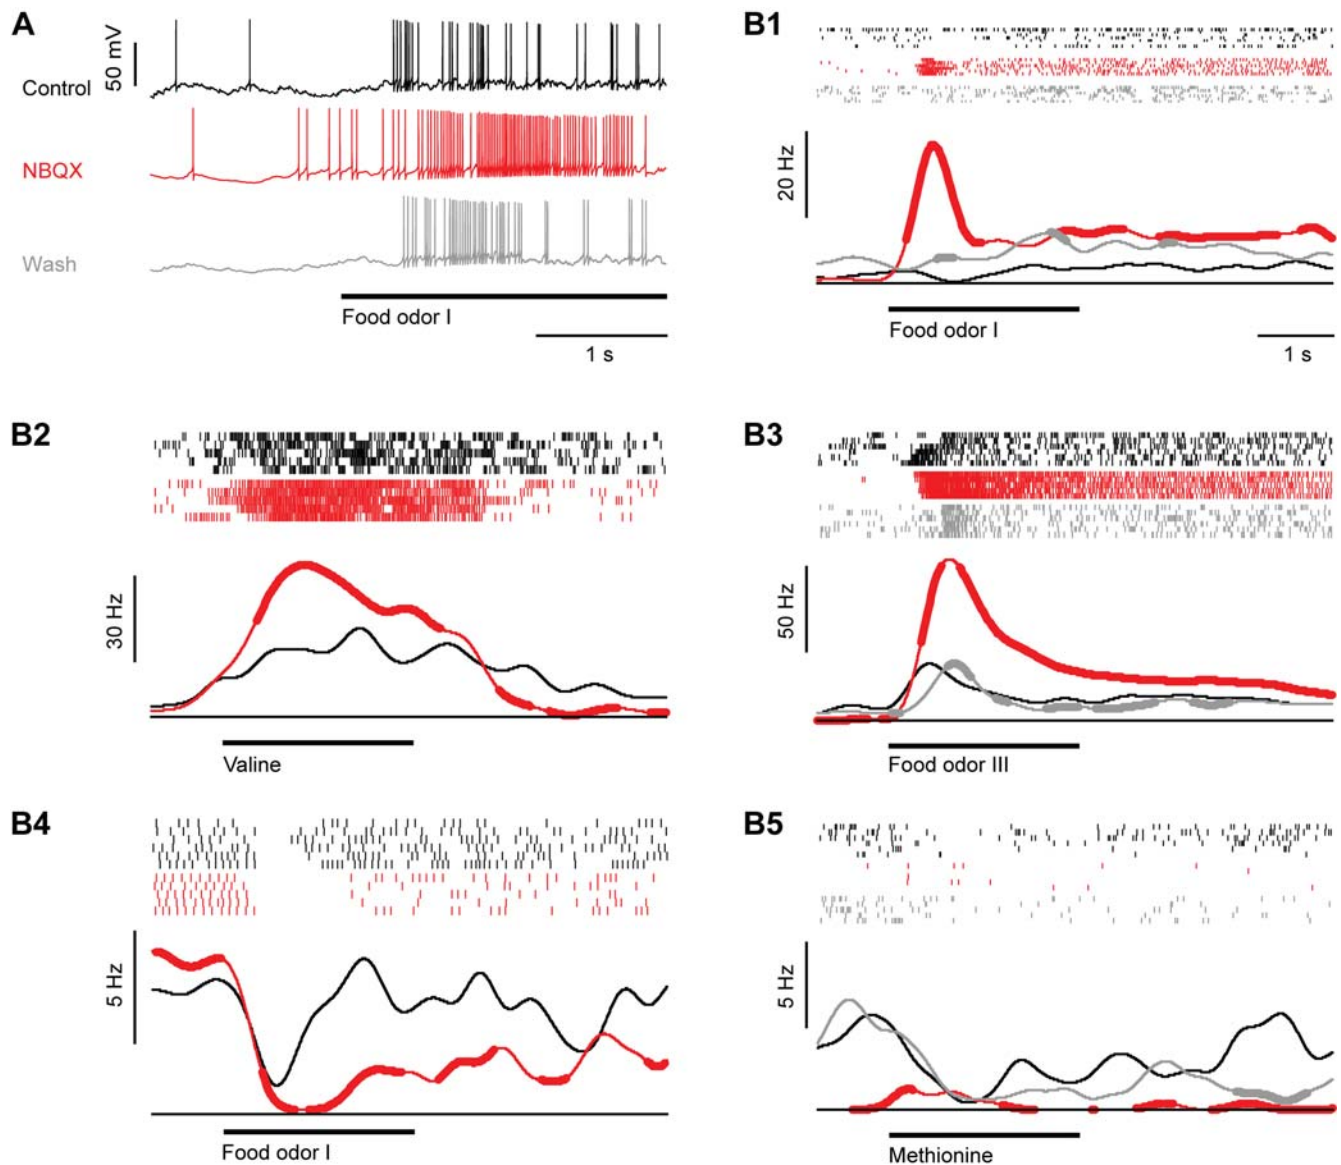

**Figure 3. Effect of the AMPA/kainate receptor antagonist, NBQX, on odor responses of mitral cells.** (A) Whole-cell recording of a mitral cell response to odor stimulation (food extract; bar) before (black) and during (red) bath-application of NBQX and after washout (gray). (B1–B5) Five examples illustrating effects of NBQX on odor responses. Ticks denote individual action potentials. Each row shows one trial. Black: control; red: during NBQX application; gray: after wash-out of NBQX. Continuous lines are peri-stimulus time histograms, averaged over all trials under each condition. Thick portions depict time bins where peri-stimulus time histograms were significantly different (Student's t-test;  $P < 0.05$ ) from the corresponding time bin in the control peri-stimulus time histogram (black). Bar indicates odor stimulation. Responses are from different cells and were recorded in the whole-cell, cell-attached or loose-patch configuration. doi:10.1371/journal.pone.0001416.g003

of NBQX in a diagram where responses are ranked according to their magnitude before drug application (Fig. 4C). Response patterns before and during application of NBQX showed obvious similarities, indicating that NBQX did not cause major changes in population activity patterns. Nevertheless, some, but not all, responses in the presence of NBQX were significantly different from control. Thus, the blockade of AMPA/kainate receptors not only scaled odor responses but also caused small changes in the distribution of activity across the mitral cell population.

To assess the effect of NBQX on the time course of mitral cell responses in more detail, we constructed peri-stimulus time histograms. The enhancement of the mean response of mitral cells was most pronounced during the early phase of the odor

response (Fig. 4D). The effect of NBQX on individual responses was examined by subtracting the peri-stimulus time histogram measured before NBQX treatment from the corresponding histogram measured in the presence of NBQX (Fig. 4E). This analysis confirmed that NBQX increased odor responses in a subset of mitral cells, particularly during the initial phase of the odor response, while suppressive effects of NBQX were small.

#### Blockade of NMDA receptors: effects on mitral cell responses

The selective blockade of NMDA receptors by AP5 had little effect on spontaneous mitral cell activity. In one mitral cell, spontaneous



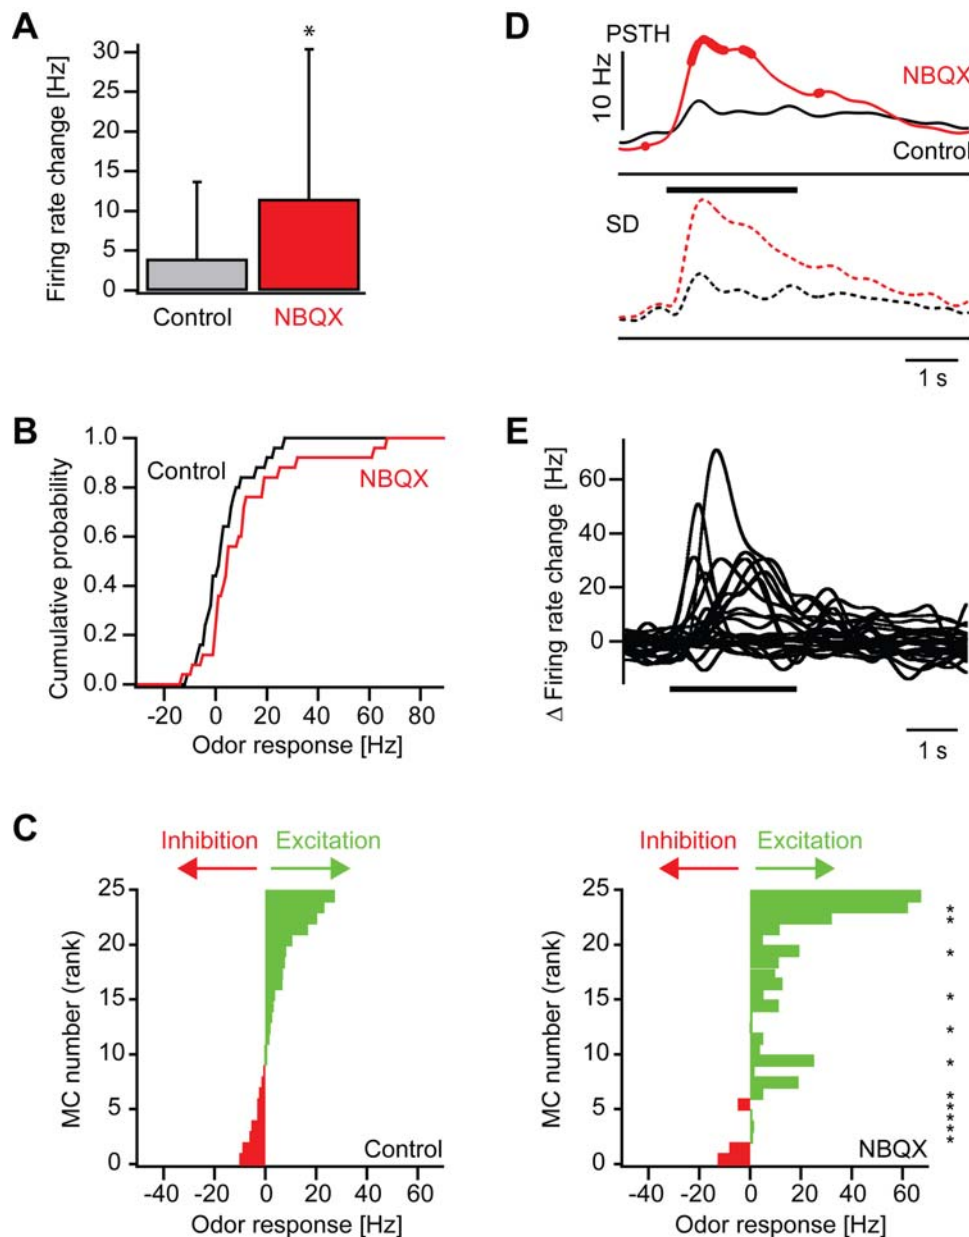

**Figure 4. Effect of NBQX on odor responses of mitral cells: quantitative analysis.** (A) Mean firing rate change evoked by odor stimulation before (control) and during NBQX treatment in the time window between 0.25 and 0.75 s after response onset. Error bars show standard deviation. \*,  $P = 0.02$  (sign test). (B) Cumulative distribution of odor-evoked firing rate changes in mitral cells before (control) and during NBQX application. (C) Left: mitral cell odor responses ranked according to the firing rate change measured before NBQX application. Right: Responses of the same mitral cells to the same odors in the presence of NBQX (same rank order as control). Asterisks denote responses that were significantly changed in the presence of NBQX (Student's  $t$ -test;  $P < 0.05$ ). (D) Top (continuous lines): average peri-stimulus time histogram of mitral cell odor responses before (control) and during NBQX treatment. Thick portions depict time bins where the peri-stimulus time histogram in the presence of NBQX was significantly different from the control peri-stimulus time histogram in the corresponding time bin (sign test;  $P < 0.05$ ). Dashed lines show standard deviation. (E) Differences of peri-stimulus time histograms (NBQX-control) for all mitral cell odor responses.  
doi:10.1371/journal.pone.0001416.g004

action potential firing was completely abolished, while it was slightly increased in others. The average spontaneous firing rates under control conditions and in the presence of AP5 were  $8.6 \pm 6.5$  Hz and  $9.4 \pm 7.2$  Hz, respectively (sign test:  $P = 1.00$ ;  $n = 12$  mitral cells). Fluctuations in the membrane potential in the presence of AP5 appeared largely unchanged as compared to control (Fig. 5A).

Odor responses were still observed after AP5 treatment in all recorded neurons ( $n = 25$  responses from 12 mitral cells; 1–3 different odors per mitral cell), but the amplitude and time course

were often changed (Fig. 5A, B). The effects caused by AP5 appeared more complex than those caused by NBQX. While excitatory response amplitudes were often slightly increased by AP5 (Fig. 5 B2–B4), decreases in response amplitude were also observed (Fig. 5A, 5B1). In some responses, AP5 affected mainly the initial transients (Fig. 5B4) whereas in other responses it also changed the later phases (Fig. 5B1, B2, B3, B5). Changes in the sign of the response amplitude were observed in 4 out of the 25 responses. In one case, a weak inhibitory response became

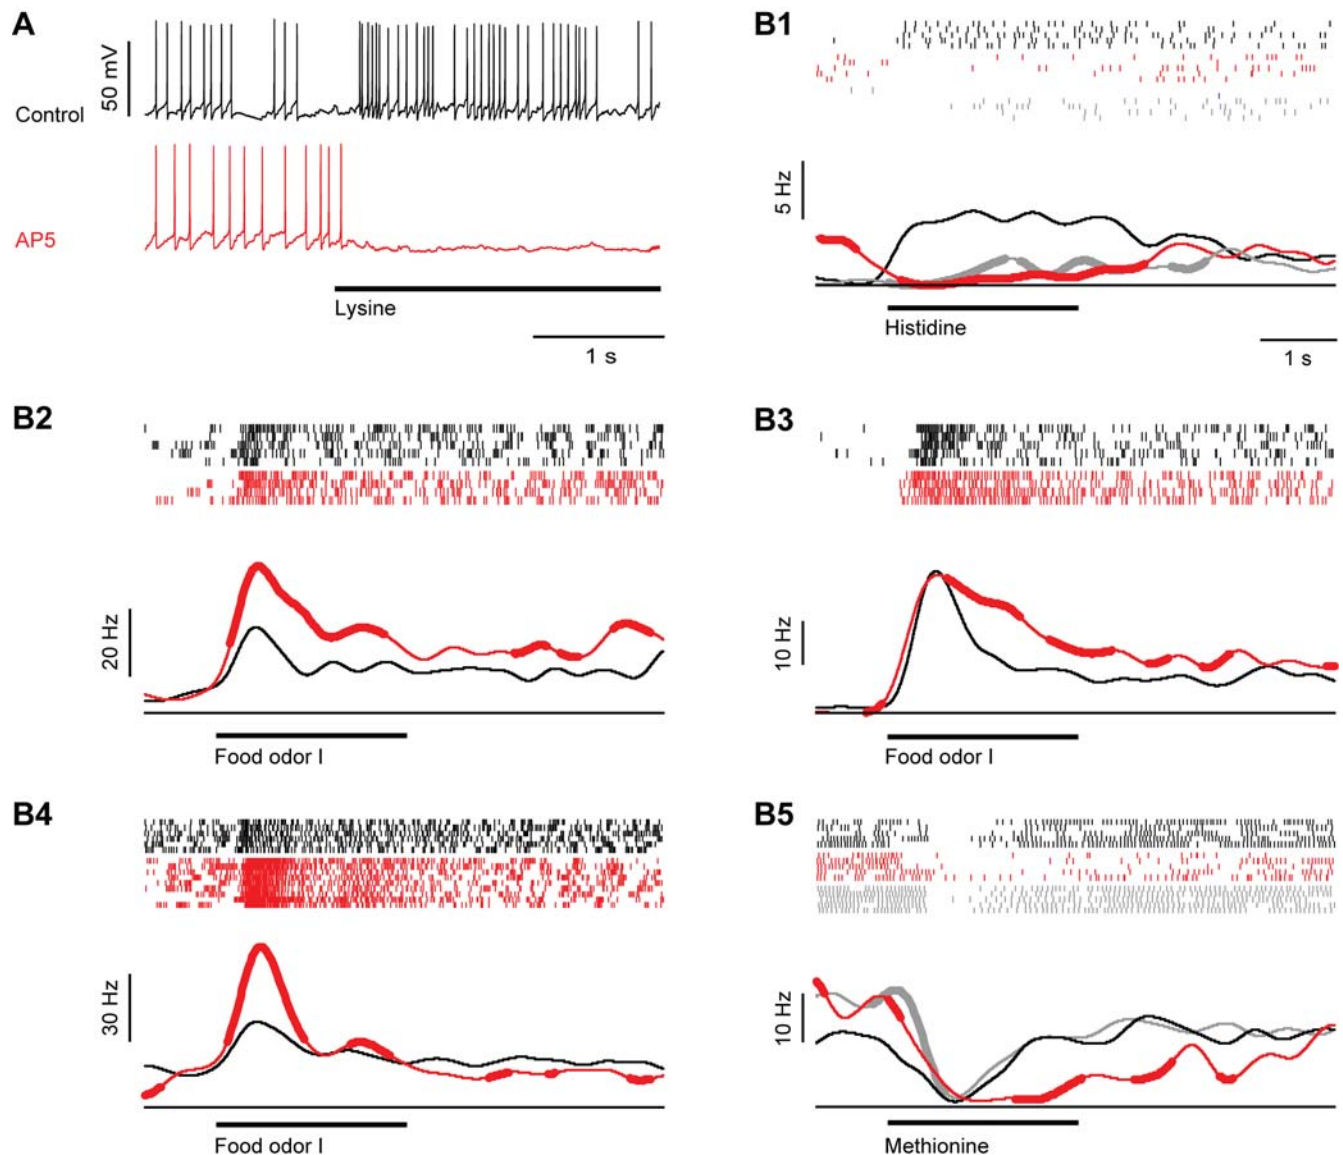

**Figure 5. Effect of the NMDA receptor antagonist, AP5, on odor responses of mitral cells.** (A) Whole-cell recording of a mitral cell response to odor stimulation (Lys, 10  $\mu$ M; bar) before (black) and during (red) application of AP5. (B1–B5) Five examples illustrating effects of AP5 on odor responses. Conventions as in Fig. 3. Responses are from different cells and were recorded in the whole-cell, cell-attached or loose-patch configuration. doi:10.1371/journal.pone.0001416.g005

excitatory while in the other three cases excitatory responses became inhibitory (Fig. 5A, B1). Effects of AP5 were at least partially reversible after washout.

In the presence of AP5, the average firing rate change of mitral cells between 0.25 s and 0.75 s amounted to  $8.5 \pm 20.8$  Hz above baseline and was not significantly different from the average firing rate change of  $5.0 \pm 15.7$  Hz under control conditions (sign test:  $p = 0.71$ ; Fig. 6A). The cumulative histogram of response amplitudes showed little or no change (Fig. 6B). The analysis of individual responses, however, revealed that AP5 increased some responses and decreased others. Consequently, the distribution of responses across the population of mitral cells in the presence of AP5 was different from control (Fig. 6C). Peri-stimulus time histograms revealed that the average time course of mitral cell firing was similar to control (Fig. 6D) but individual mitral cell responses could be increased or decreased, often within certain time windows (Fig. 6E). Largest changes were observed shortly after response onset, but later

phases could also be affected. Hence, AP5 had little effect on the average magnitude and time course of the population response but caused complex changes of individual mitral cell responses and spatio-temporal activity patterns.

### Effects of ionotropic glutamate receptor antagonists on local field potential oscillations

In the absence of drugs, all stimuli evoked local field potential oscillations with a frequency around 20 Hz (Fig. 7A–D). Because amplitudes were largest in response to food extracts, we concentrated on these stimuli for further experiments. NBQX completely abolished local field potential oscillations in response to food extracts (Fig. 7A, B, E), as observed in 6 olfactory bulbs. The power in the 15–30 Hz band was significantly reduced to  $5 \pm 1\%$  of control (t-test:  $P < 0.001$ ). AP5 reduced, but not completely abolished, local field potential oscillations (Fig. 7C–E), as observed

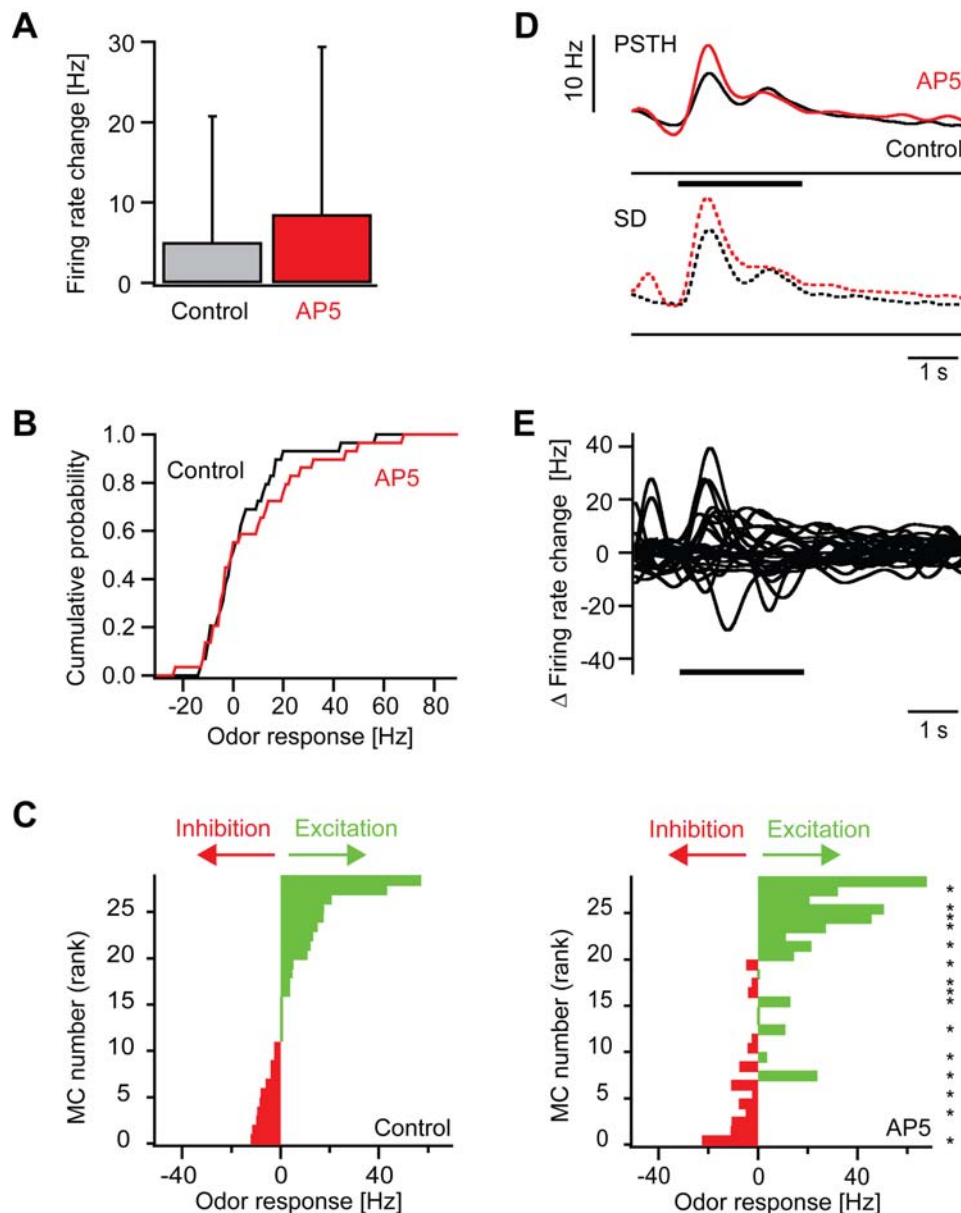

**Figure 6. Effect of AP5 on odor responses of mitral cells: quantitative analysis.** (A) Mean firing rate change evoked by odor stimulation before (control) and during AP5 treatment in the time window between 0.25 and 0.75 s after response onset. (B) Cumulative distribution of odor-evoked firing rate changes in mitral cells before (control) and during application of AP5. (C) Left: mitral cell odor responses ranked according to the firing rate change measured before application of AP5. Right: Responses of the same mitral cells to the same odors in the presence of AP5 (same rank order as control). Asterisks denote responses that were significantly changed in the presence of AP5 (Student's t-test;  $P < 0.05$ ). (D) Top (continuous lines): average peri-stimulus time histogram of mitral cell odor responses before (control) and during application of AP5. Thick portions depict time bins where the peri-stimulus time histogram in the presence of AP5 was significantly different from the control peri-stimulus time histogram in the corresponding time bin (sign test;  $P < 0.05$ ). Bottom (dashed lines): standard deviation. (E) Differences of peri-stimulus time histograms (AP5-control) for all mitral cell odor responses. doi:10.1371/journal.pone.0001416.g006

in 4 olfactory bulbs. The power in the 15–30 Hz band was significantly reduced to  $44 \pm 30\%$  of control (t-test:  $P < 0.01$ ). Moreover, the oscillation frequency was slightly increased compared to control in all experiments (Fig. 7D). The effects of both drugs were reversible after washout (Fig. 7A, C).

### Measurements of odor-evoked activity patterns by 2-photon $\text{Ca}^{2+}$ imaging

Although AMPA/kainate and NMDA receptors mediate excitatory synaptic input from olfactory sensory neurons to mitral cells,

the blockade of one receptor type alone did not reduce the average excitation of mitral cells, suggesting that ionotropic glutamate receptors also influence mitral cell responses via other, multisynaptic pathways. We therefore analyzed the effect of ionotropic glutamate receptor antagonists on network activity patterns using 2-photon  $\text{Ca}^{2+}$  imaging after bolus loading of olfactory bulb neurons with the red-fluorescent  $\text{Ca}^{2+}$  indicator, rhod-2. Mitral cells and interneurons were distinguished by the expression of the mitral cell marker, HuC-YC [32,33], that was detected simultaneously in a separate emission channel. Somatic  $\text{Ca}^{2+}$  signals reflect the spike output of individual mitral cells and interneurons

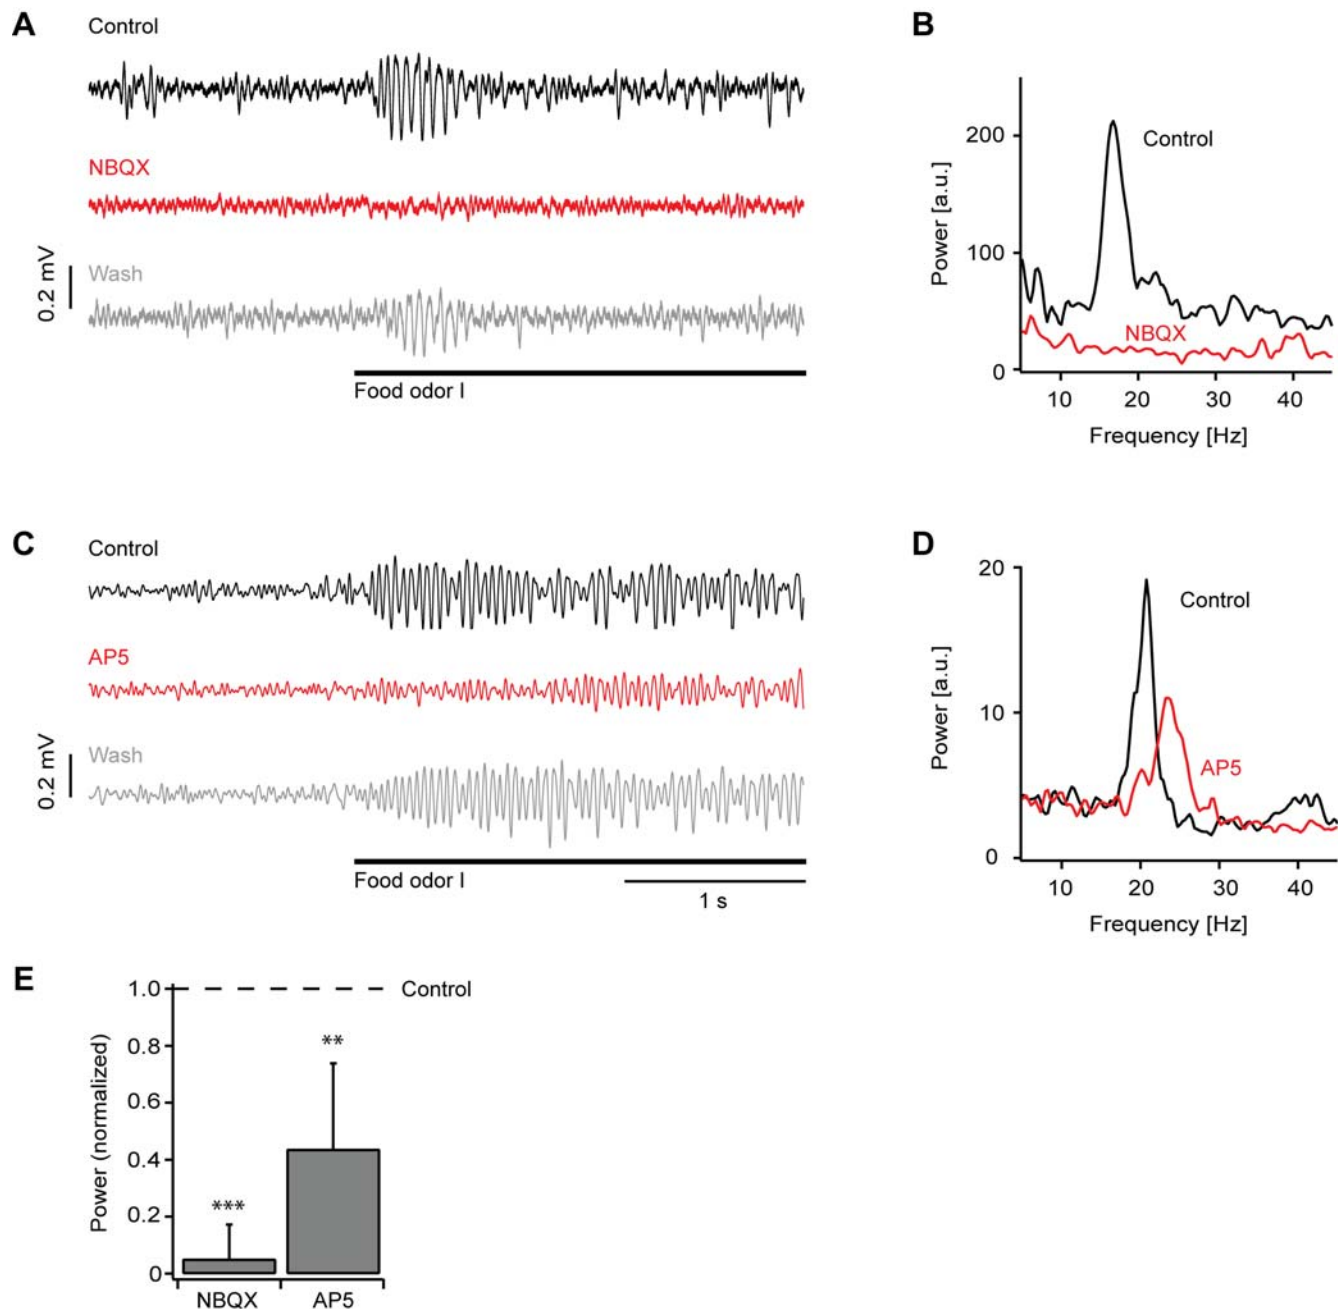

**Figure 7. Effect of NBQX and AP5 on local field potential oscillations.** (A) Example of a local field potential recording (bandpass-filtered 8–43 Hz) of an odor response (food odor; bar) before (black) and during application of NBQX (red) and after washout (gray). (B) Example of power spectra of local field potential responses before and during application of NBQX (average of 7 trials; calculated from unfiltered traces). (C) Example of a local field potential recording of an odor response before and during application of AP5 and after washout. (D) Example of power spectra before and during application of AP5 (average of 14 trials; calculated from unfiltered traces). (E) Average local field potential power (15–30 Hz) in the presence of NBQX ( $n = 6$  olfactory bulbs) and AP5 ( $n = 4$  olfactory bulbs), normalized to control. \*\*\*,  $P < 0.001$ ; \*\*,  $P < 0.01$ . doi:10.1371/journal.pone.0001416.g007

[34] and are stable over hours [35]. 2-photon  $\text{Ca}^{2+}$  imaging therefore permits measurements of odor-evoked action potential firing from many neurons, including interneurons in deep layers that are difficult to record using electrophysiological methods.

We first examined the effect of glutamate receptor antagonists on odor-evoked  $\text{Ca}^{2+}$  signals of mitral cells using the same drug application protocol as before (Fig. 8A). In many mitral cells, NBQX increased the amplitude of odor-evoked  $\text{Ca}^{2+}$  signals, while decreases in response amplitude were rarely observed. On average,

NBQX significantly increased  $\text{Ca}^{2+}$  signals to 150% of control (sign test:  $P = 0.002$ ; Fig. 8B). Consequently, the cumulative distribution of response amplitudes was shifted towards higher amplitudes (Fig. 8C). At the level of individual mitral cells, the effect of NBQX varied in magnitude (Fig. 8D, E). The correlation between mitral cell activity patterns before and during NBQX treatment was 0.73 (Fig. 8D;  $n = 190$  responses; pooled over all mitral cells and odors). As a control, we performed the same procedures in a different set of fish except that NBQX was omitted during the wash-in period. The



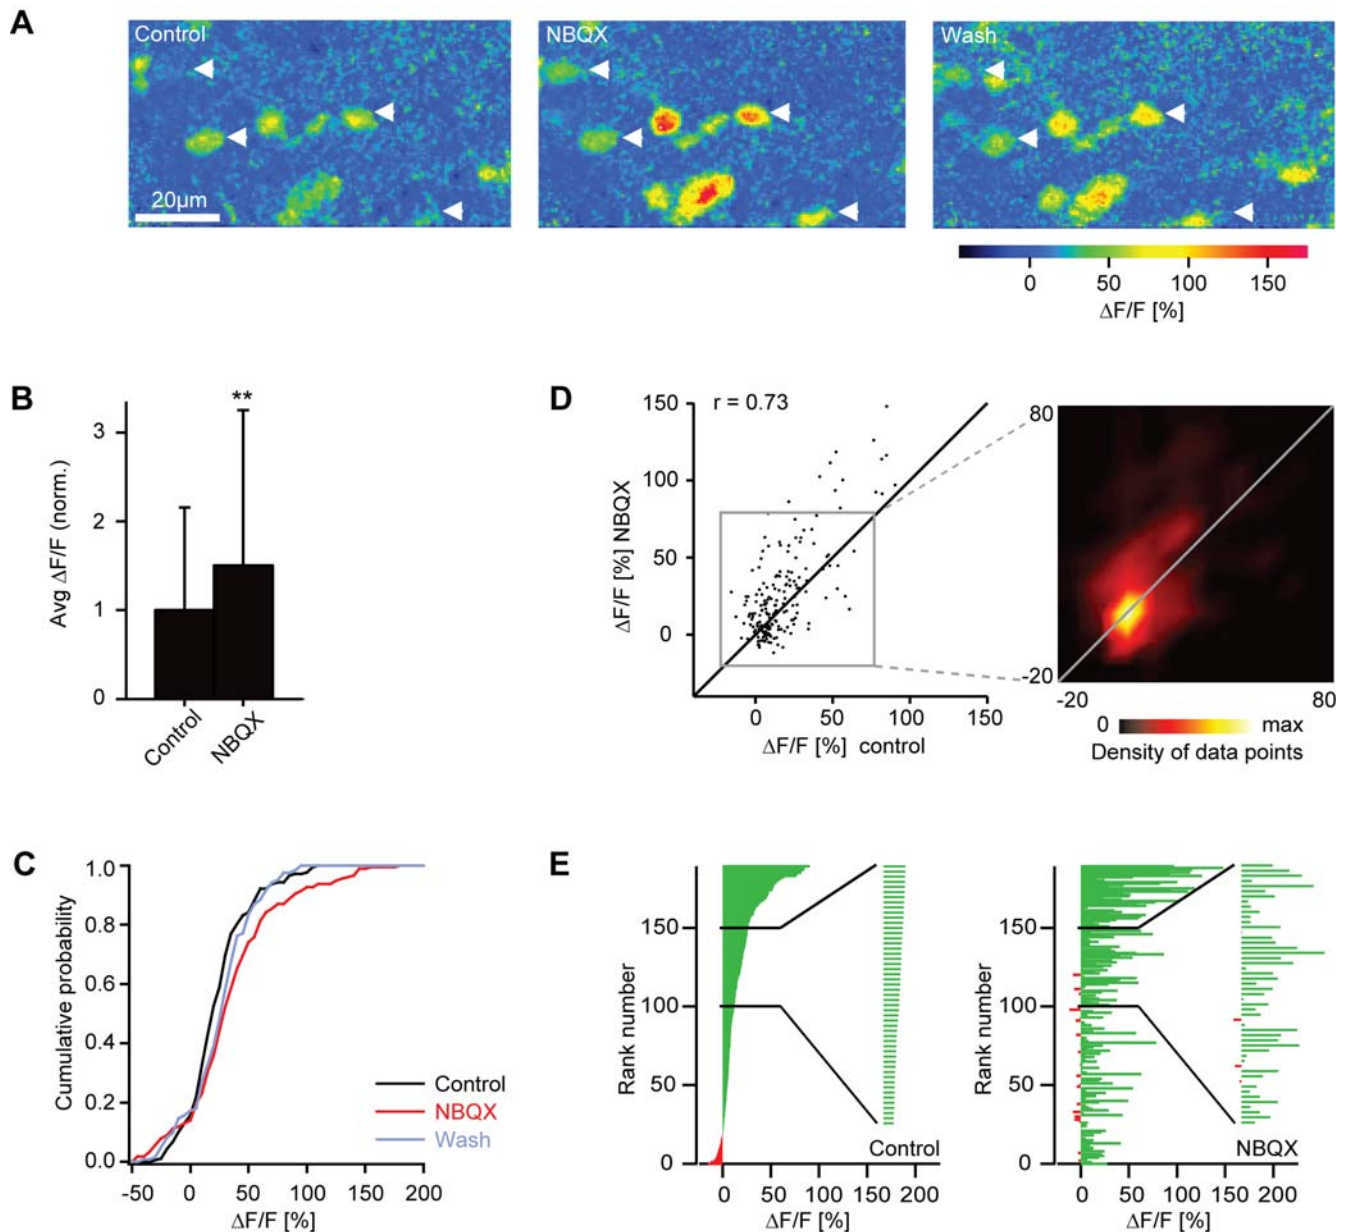

**Figure 8. Effect of NBQX on mitral cell responses measured by 2-photon  $Ca^{2+}$  imaging.** (A) Odor-evoked  $Ca^{2+}$  signals in mitral cells before, during and after application of NBQX (stimulus: Trp, 10  $\mu$ M). Arrows depict somata of neurons identified as mitral cells by expression of the genetically encoded fluorescence marker HuC-YC. (B) Average somatic  $Ca^{2+}$  signals before (control) and during application of NBQX, normalized to control. Error bars show standard deviation. \*\*,  $P = 0.002$  (sign test). (C) Cumulative distribution of  $Ca^{2+}$  signal amplitudes before (black) and during application of NBQX (red) and after washout (gray). (D) Comparison of  $Ca^{2+}$  signal amplitudes evoked by the same odors in the same mitral cells before and during application of NBQX. Data were pooled over all cells, odors and animals ( $n = 190$  responses).  $r$ , Pearson correlation coefficient. Inset shows the density of data points in the boxed region. Lines are diagonals with slope one. (E) Left: mitral cell odor responses ranked according to the  $Ca^{2+}$  signal before application of NBQX. Inset shows an enlargement of a subregion. Right: Responses of the same mitral cells to the same odors in the presence of NBQX, ranked in the same order as in the control.  
doi:10.1371/journal.pone.0001416.g008

correlation between activity patterns in these control experiments ( $r = 0.78$ ;  $n = 126$  responses) was slightly, but not significantly ( $P = 0.32$ ), higher than in experiments using NBQX. Hence, NBQX increased the amplitude of the mitral cell population response but had little or no effect on the odor-evoked pattern of  $Ca^{2+}$  signals across the mitral cell population.

Blockade of NMDA receptors by AP5 had diverse effects on odor-evoked  $Ca^{2+}$  signals of individual mitral cells, including increases and decreases of the response (Fig. 9A). The average response amplitude was 86% of control and not significantly

different from control (sign test:  $P = 0.26$ ; Fig. 9B). The cumulative histogram of response amplitudes showed no obvious change (Fig. 9C). However, the activity pattern across the mitral cell population differed from control because some responses were increased while others were decreased (Fig. 9D, E). The correlation between activity patterns before and during AP5 treatment was 0.45 ( $n = 742$  responses) and significantly different from control ( $r = 0.78$ ;  $n = 126$  responses;  $P < 0.001$ ). Hence, AP5 did not significantly affect the mean response amplitude of mitral cells but changed the pattern of activity across the population. The

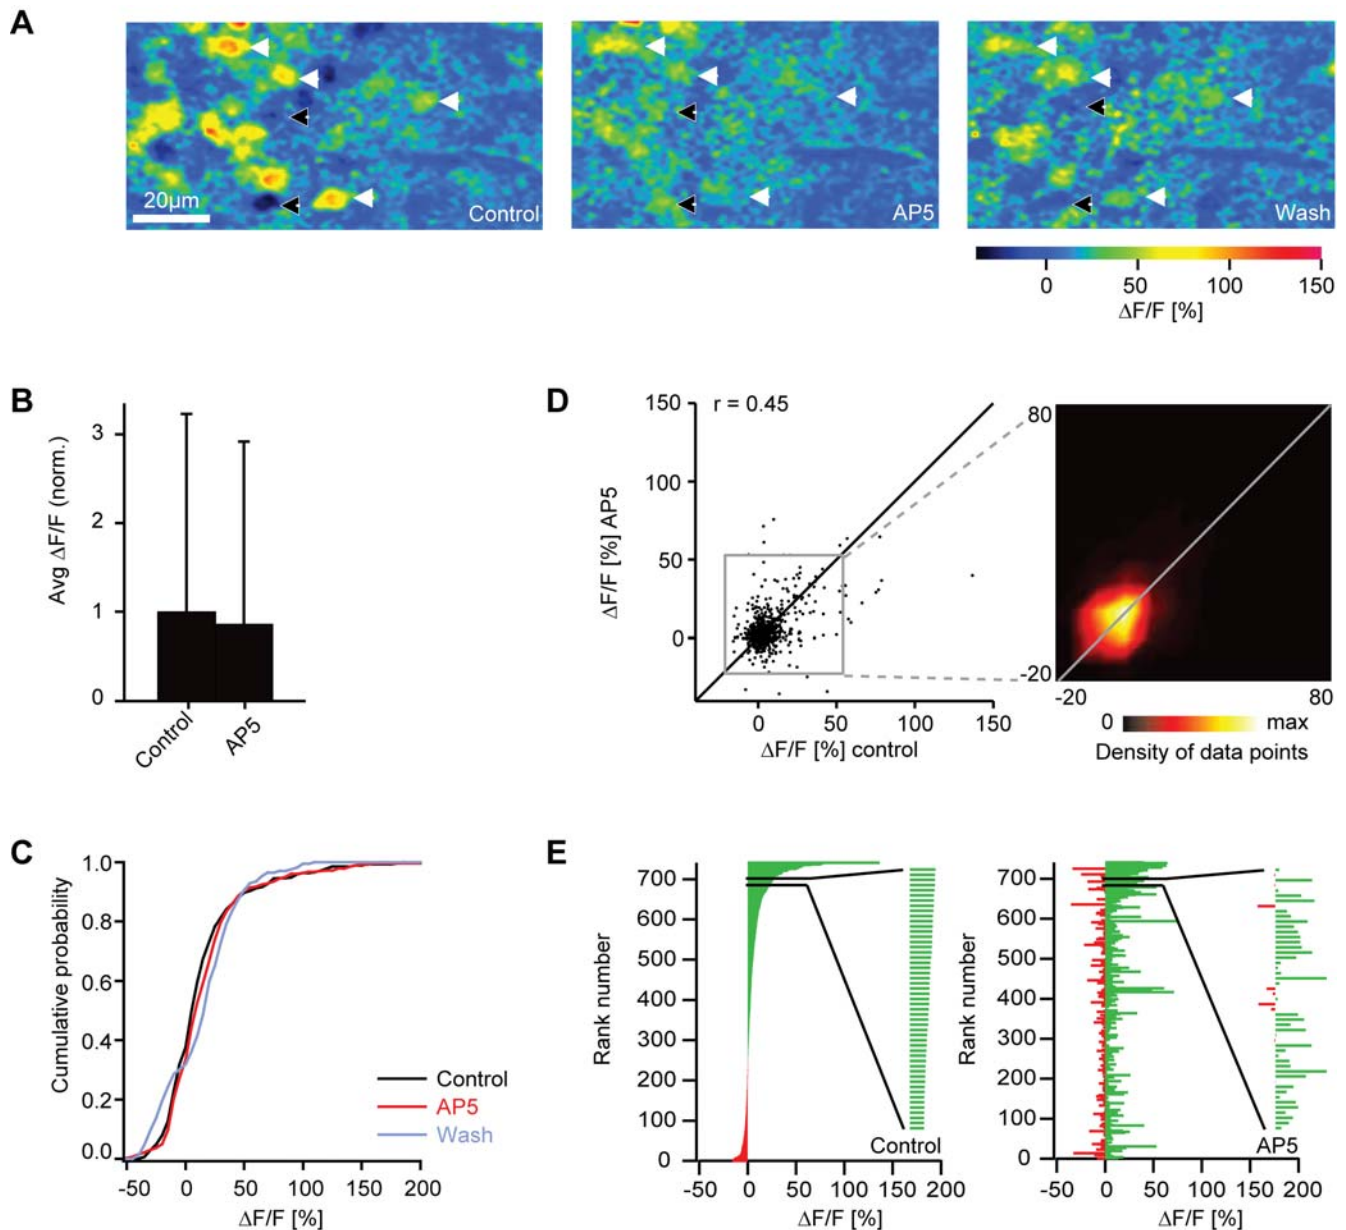

**Figure 9. Effect of AP5 on mitral cell responses measured by 2-photon  $\text{Ca}^{2+}$  imaging.** (A) Odor-evoked  $\text{Ca}^{2+}$  signals in mitral cells before, during and after application of AP5 (stimulus: food extract). Arrows depict somata of neurons identified as mitral cells by expression of the genetically encoded fluorescence marker HuC-YC. Black and white arrows show mitral cells whose response was increased and decreased, respectively, by AP5 treatment. (B) Average somatic  $\text{Ca}^{2+}$  signals before (control) and during application of AP5, normalized to control. Error bars show standard deviation. (C) Cumulative distribution of  $\text{Ca}^{2+}$  signal amplitudes before (black) and during application of AP5 (red) and after washout (gray). (D) Comparison of  $\text{Ca}^{2+}$  signal amplitudes evoked by the same odors in the same mitral cells before and during application of AP5. Data were pooled over all cells, odors and animals ( $n = 742$  responses).  $r$ , Pearson correlation coefficient. Inset shows the density of data points in the boxed region. Lines are diagonals with slope one. (E) Left: mitral cell odor responses ranked according to the  $\text{Ca}^{2+}$  signal before application of AP5. Inset shows an enlargement of a subregion. Right: Responses of the same mitral cells to the same odors in the presence of AP5, ranked in the same order as in the control. doi:10.1371/journal.pone.0001416.g009

effects of AP5 and NBQX on odor-evoked patterns of  $\text{Ca}^{2+}$  signals across mitral cells are therefore consistent with those observed in electrophysiological experiments.

### Effects of ionotropic glutamate receptor antagonists on interneuron activity

Somata of interneurons in the deeper layers of the olfactory bulb are densely packed and show pronounced  $\text{Ca}^{2+}$  signals in response

to odor stimulation (Fig. 10A) [34,35]. In the presence of NBQX, response amplitudes of many interneurons were decreased and response patterns appeared sparser.  $\text{Ca}^{2+}$  signals in the neuropil were also substantially smaller (Fig. 10A). The average somatic  $\text{Ca}^{2+}$  signal of interneurons was significantly reduced to 47% of control (sign test:  $P < 0.001$ ; Fig. 10B) and the cumulative distribution of response amplitudes was shifted towards lower amplitudes (Fig. 10C). NBQX therefore increased the ratio between the mean mitral cell response and the mean interneuron

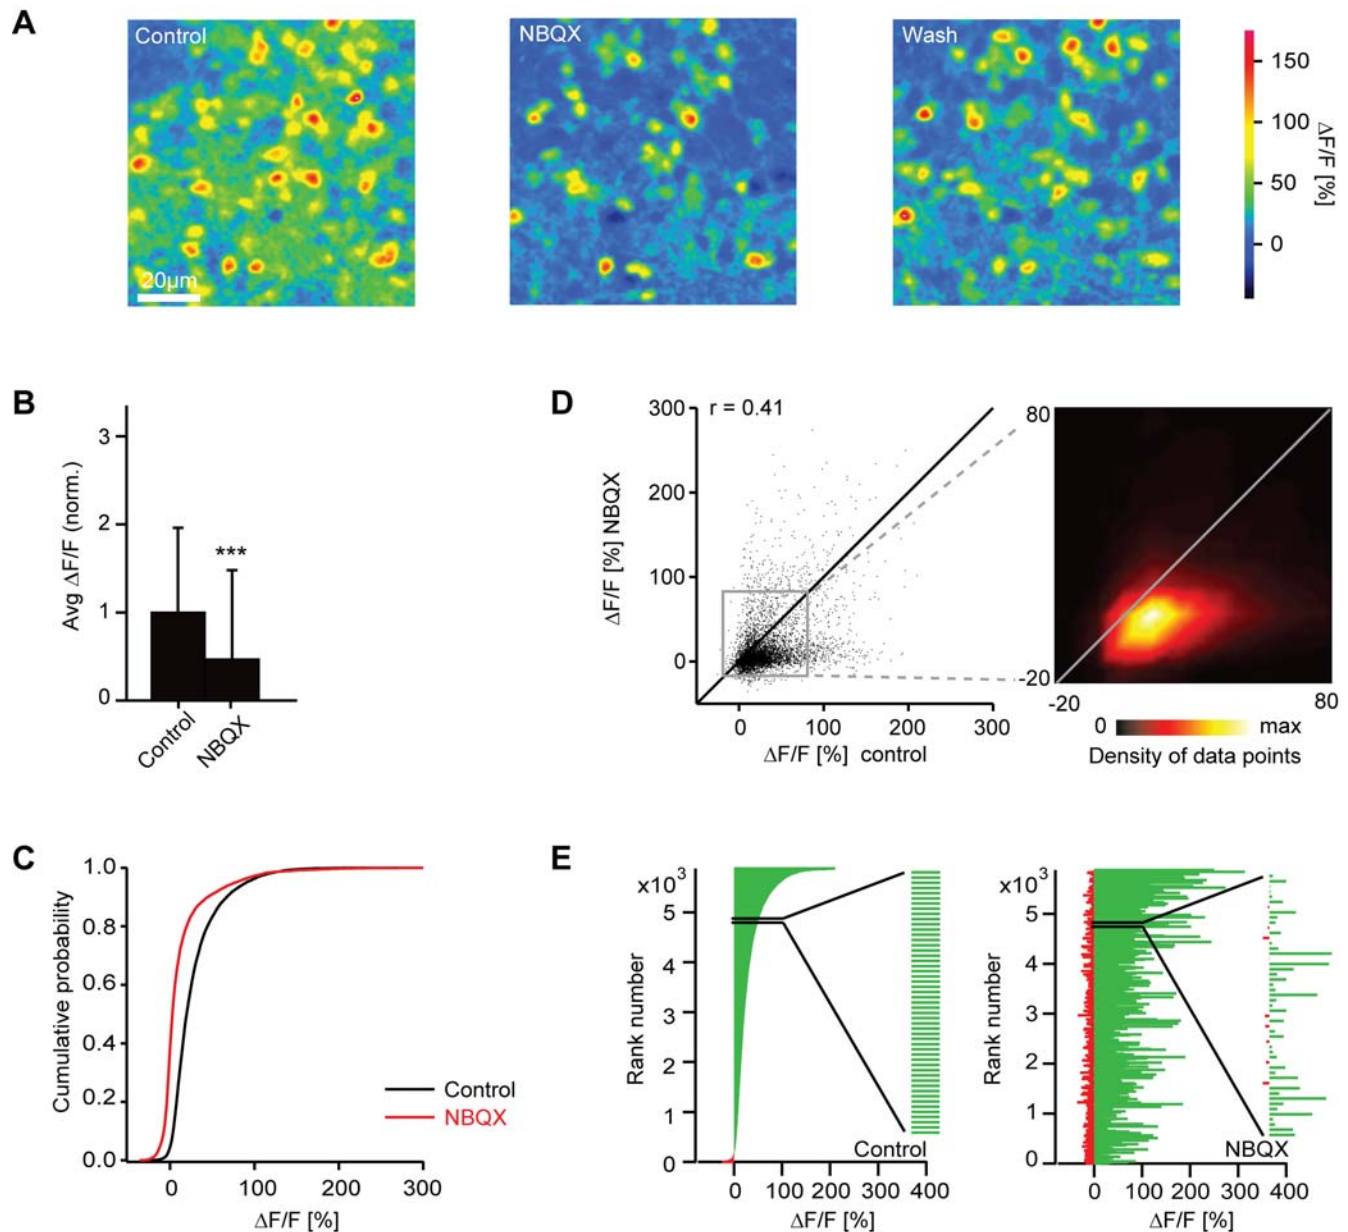

**Figure 10. Effect of NBQX on interneuron responses measured by 2-photon  $\text{Ca}^{2+}$  imaging.** (A) Odor-evoked  $\text{Ca}^{2+}$  signals in interneurons before, during and after application of NBQX (stimulus: food odor). (B) Average somatic  $\text{Ca}^{2+}$  signals before (control) and during application of NBQX, normalized to control. Error bars show standard deviation. \*\*\*,  $P < 0.001$  (sign test). (C) Cumulative distribution of  $\text{Ca}^{2+}$  signal amplitudes before (black) and during (red) application of NBQX. Data were pooled over all cells, odors and animals ( $n = 5878$  responses). (D) Comparison of  $\text{Ca}^{2+}$  signal amplitudes evoked by the same odors in the same interneurons before and during application of NBQX. Data were pooled over all cells, odors and animals ( $n = 5878$  responses).  $r$ , Pearson correlation coefficient. Inset shows the density of data points in the boxed region. Lines are diagonals with slope one. (E) Left: interneuron odor responses ranked according to the  $\text{Ca}^{2+}$  signal before application of NBQX. Right: Responses of the same interneurons to the same odors in the presence of NBQX, ranked in the same order as in the control. Inset shows an enlargement of a subregion to demonstrate that low-amplitude values are interspersed between high amplitude values. The visual impression in the full diagram that many amplitudes are increased during NBQX treatment is therefore an artifact caused by crowding of bars in the graph.  
doi:10.1371/journal.pone.0001416.g010

response by a factor of 3.2. At the level of individual interneuron somata, the effect of NBQX was diverse. Not all responses were reduced by the same amount, and some responses were even enhanced (Fig. 10A, D, E). The correlation between activity patterns before and during NBQX treatment was 0.41 ( $n = 5878$  responses; pooled over all interneurons and odors) and significantly lower than the correlation between activity patterns in control experiments without drugs ( $r = 0.71$ ;  $n = 208$  responses;

$P < 0.001$ ). Hence, blockade of AMPA/kainate receptors decreased the mean response of interneurons and changed the activity pattern across the interneuron population.

Blockade of NMDA receptors by AP5 caused only a slight change in the mean response amplitude of interneurons to 109% of control (sign test;  $P < 0.001$ ; Fig. 11A, B) and the cumulative histogram of response amplitudes remained similar (Fig. 11C). AP5 therefore changed the ratio between the mean mitral cell



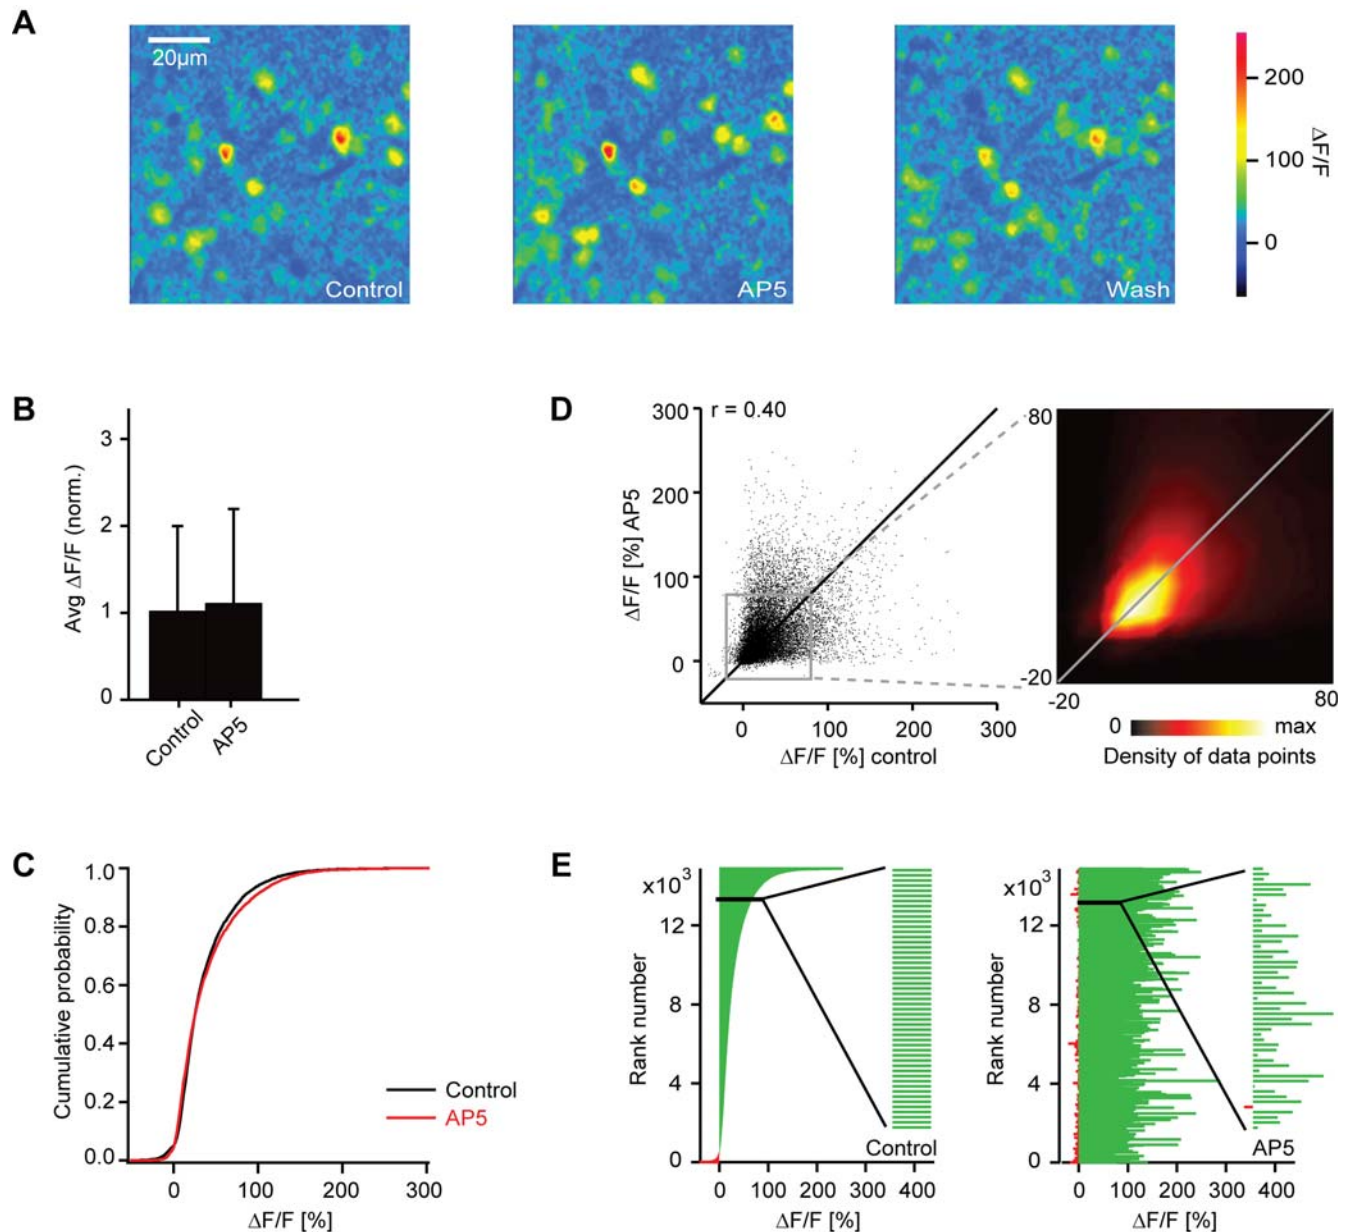

**Figure 11. Effect of AP5 on interneuron responses measured by 2-photon  $\text{Ca}^{2+}$  imaging.** (A) Odor-evoked  $\text{Ca}^{2+}$  signals in interneurons before, during and after application of AP5 (stimulus: food odor). (B) Average somatic  $\text{Ca}^{2+}$  signals before (control) and during application of AP5, normalized to control. Error bars show standard deviation. (C) Cumulative distribution of  $\text{Ca}^{2+}$  signal amplitudes before (black) and during (red) application of AP5. (D) Comparison of  $\text{Ca}^{2+}$  signal amplitudes evoked by the same odors in the same interneurons before and during application of AP5.  $r$ , Pearson correlation coefficient. Inset shows the density of data points in the boxed region. Lines are diagonals with slope one. (E) Left: interneuron odor responses ranked according to the  $\text{Ca}^{2+}$  signal before application of AP5. Data were pooled over all cells, odors and animals ( $n = 14884$  responses). Right: Responses of the same interneurons to the same odors in the presence of AP5, ranked in the same order as in the control. Inset shows an enlargement of a subregion to demonstrate that low-amplitude values are interspersed between high amplitude values. The visual impression in the full diagram that many amplitudes are increased during AP5 treatment is therefore an artifact caused by crowding of bars in the graph. doi:10.1371/journal.pone.0001416.g011

response and the mean interneuron response by a factor of 0.79. Individual interneuron responses, however, were often increased or decreased by AP5 (Fig. 11D, E). The correlation between activity patterns before and during AP5 treatment was 0.40 ( $n = 14884$  responses) and significantly different from control ( $r = 0.71$ ;  $n = 208$  responses;  $P < 0.001$ ). Hence, the blockade of NMDA receptors had little effect on the overall amplitude of interneuron responses but caused a redistribution of activity across the population.

## DISCUSSION

### Function of ionotropic glutamate receptors in the intact olfactory bulb

We used pharmacological manipulations in combination with electrophysiology and 2-photon  $\text{Ca}^{2+}$  imaging to study the functions of ionotropic glutamate receptors in neuronal circuits of the intact olfactory bulb. Electrophysiology records action potentials and subthreshold synaptic input at high temporal



resolution while 2-photon  $\text{Ca}^{2+}$  imaging detects responses of many individual neurons simultaneously. The two recording methods therefore have complementary advantages and yielded consistent results.

The combined blockade of AMPA/kainate and NMDA receptors completely inhibited spontaneous and odor-evoked activity of mitral cells, indicating that ionotropic glutamate receptors mediate excitatory synaptic transmission from olfactory sensory neurons to mitral cells, as reported in other vertebrates [30,31]. Paradoxically, however, the selective blockade of AMPA/kainate or NMDA receptors did not decrease the mean response of mitral cells. Rather, the AMPA/kainate receptor antagonist even increased the mean mitral cell response, and both antagonists had complex effects on neuronal responses including changes in the sign. Moreover, ionotropic glutamate receptor antagonists, particularly AP5, changed the spatio-temporal patterns of activity across mitral cell and interneuron populations. These effects cannot be explained by a partial blockade of the excitatory olfactory sensory neuron→mitral cell synapse alone but imply that ionotropic glutamate receptors influence mitral cell firing also via additional, multisynaptic pathways. The most obvious pathway is the mitral cell→interneuron→mitral cell pathway. In addition, ionotropic glutamate receptor antagonists may modulate other sub-circuits in the olfactory bulb or the feedback from higher brain regions onto interneurons (Fig. 1). Our results therefore indicate that olfactory bulb output activity is strongly influenced by synaptic pathways within and possibly beyond the olfactory bulb and provide insights into the underlying mechanisms.

### Regulation of excitation and inhibition in the olfactory bulb

Ionotropic glutamate receptors not only mediate excitatory input from olfactory sensory neurons to mitral cells but are also involved in synaptic pathways that activate interneurons, which in turn provide inhibitory input to mitral cells (Fig. 1). In the presence of an ionotropic glutamate receptor antagonist, the mean mitral cell response amplitude may therefore decrease, stay unchanged, or even increase, depending on the relative contribution of each ionotropic glutamate receptor type to each of these pathways. NBQX increased the mean response of mitral cells even though it decreases excitatory synaptic input from olfactory sensory neurons, indicating that the inhibition of AMPA/kainate receptors attenuates input from inhibitory interneurons more strongly than the excitatory input from olfactory sensory neurons. Consistent with this conclusion, NBQX significantly decreased the mean response of interneurons. The ratio between excitation and inhibition of mitral cells therefore depends on AMPA/kainate receptor-containing circuits such as the mitral cell→interneuron→mitral cell circuit or glutamatergic connections to interneurons from higher brain areas. Hence, AMPA/kainate receptor-containing circuits regulate mitral cell population activity during an odor response.

The regulation of mitral cell activity by inhibitory feedback circuits could maintain a stable level of mitral cell population activity when the strength of afferent glomerular input changes. Indeed, the total mitral cell activity converges towards a common level within a few hundred milliseconds in response to odors that evoke different amounts of activity across olfactory sensory neurons [3]. In a natural environment, the total sensory input can vary over a wide range because the number and intensity of activated glomeruli differs substantially across odors and concentrations. The AMPA/kainate receptor-containing synaptic pathways mediating inhibitory feedback onto mitral cells may therefore

establish a balance between excitatory and inhibitory inputs to mitral cells that keeps the total amount of activity in the olfactory bulb within an adequate range.

The occurrence of prominent odor responses in the presence of NBQX confirms that NMDA receptors contribute to basal synaptic transmission in the olfactory bulb [36–38] under natural conditions. Unlike the blockade of AMPA/kainate receptors, however, the blockade of NMDA receptors had little or no effect on the mean activity of mitral cells and interneurons, indicating that NMDA receptors are less important for the regulation of mitral cell population activity than AMPA/kainate receptors. Nevertheless, the blockade of NMDA receptors changed the magnitude and time course of individual mitral cell responses. The NMDA receptors are therefore involved in shaping spatio-temporal activity patterns of olfactory bulb output activity.

### AMPA/kainate receptor-dependent control of interneuron activity and mitral cell inhibition

In mammalian brain slices, NMDA receptors are critically involved in the activation of granule cells and in the recurrent inhibition of mitral cells by asynchronous GABA release from interneuron dendrites [15,16,19]. However, when synaptic background activity is introduced into an olfactory bulb slice, activation of granule cell firing becomes NMDA receptor-independent and asynchronous GABA release appears to be strongly diminished [39]. Under these conditions, recurrent inhibition is likely to be weak [39]. It is therefore unclear how interneuron firing and inhibition of mitral cells is controlled during an odor response in the intact olfactory bulb. We found that the mean odor-evoked somatic  $\text{Ca}^{2+}$  signal in interneurons was reduced by the blockade of AMPA/kainate receptors, but not by the blockade of NMDA receptors. Somatic  $\text{Ca}^{2+}$  signals in zebrafish mitral cells and interneurons reflect mainly action potential firing [34,35]. Our data therefore indicate that interneuron firing is controlled primarily by AMPA/kainate receptors during an odor response.

Asynchronous GABA release from interneuron dendrites can also be triggered without action potentials, for example by  $\text{Ca}^{2+}$  influx through NMDA receptors at reciprocal synapses [15,16,18,20]. It is therefore possible that NMDA receptors influence recurrent inhibition of mitral cells even if they do not strongly affect interneuron firing. If so, the blockade of NMDA receptors should increase the ratio between the mean activity of mitral cells and interneurons. However, this was not observed. Our data therefore suggest that the effect of recurrent inhibition by NMDA receptor-dependent asynchronous GABA release on mitral cell firing is, on average, weak compared to the effect of other synaptic pathways. Nevertheless, the blockade of NMDA receptors often changed individual responses of interneurons and mitral cells. Hence, NMDA receptors appear to influence odor responses in a subset of neurons and thereby cause complex effects on spatio-temporal activity patterns within the network.

Unlike inhibition of NMDA receptors, the blockade of AMPA/kainate receptors increased the mean response of mitral cells and decreased the mean somatic  $\text{Ca}^{2+}$  response of interneurons. The most likely explanation for these effects is that inhibitory input to mitral cells during an odor response is mediated primarily by AMPA/kainate receptor-dependent action potential firing of interneurons, consistent with predictions based on data from mammalian brain slices in the presence of synaptic background activity [39]. Action potentials invade large portions of the dendritic tree in interneurons [21–23] and are thought to trigger GABA release onto multiple postsynaptic mitral cells. Hence,

lateral inhibition, rather than recurrent inhibition, may be the dominant mode of mitral cell inhibition during an odor response. Further experiments are required to test this hypothesis and to identify the synaptic pathways underlying the AMPA/kainate receptor-dependent activation of interneuron firing during an odor response.

### Effect of glutamate receptor antagonists on odor-evoked oscillatory synchronization

Oscillatory local field potential activity was abolished or reduced by the blockade of AMPA/kainate receptors or NMDA receptors, respectively, indicating that ionotropic glutamate receptors are required for the rhythmic synchronization of neuronal ensembles in the olfactory bulb. Oscillatory synchronization is thought to be mediated by networks of mitral cells and interneurons coupled by fast excitatory mitral cell→interneuron synapses and inhibitory interneuron→mitral cell synapses. Experiments in mammalian brain slices indicate that the fast inhibitory connections are mediated by GABA<sub>A</sub> receptors [40–42] and that the fast excitatory connection is mediated by AMPA/kainate receptors [39], but the involvement of these connections in odor-evoked oscillatory synchronization has, to our knowledge, not been tested directly in the intact olfactory bulb. Our finding that AMPA/kainate receptor antagonists abolish odor-evoked oscillatory synchronization strongly supports the notion that the fast excitatory transmission in this circuit is mediated by AMPA/kainate receptors.

Because of their slow kinetics, NMDA receptors are unlikely to be directly involved in fast oscillatory synchronization in the olfactory bulb. Nevertheless, NMDA receptor antagonists reduced odor-evoked local field potential oscillations and slightly increased the oscillation frequency. One possible explanation is that NMDA receptor-mediated depolarization facilitates action potential firing of interneurons, which could enhance synchronization. However, NMDA receptor antagonists did not, on average, reduce odor-evoked Ca<sup>2+</sup> signals in interneuron somata. Further experiments are therefore necessary to clarify the role of NMDA receptors in oscillatory synchronization.

### Functional implications of ionotropic glutamate receptor-containing circuits in the olfactory bulb

Synaptic pathways containing ionotropic glutamate receptors are likely to mediate important computational functions in the olfactory bulb. Under natural conditions, the number and intensity of activated glomeruli varies greatly among different odors and concentrations. The regulation of mitral cell population activity by feedback circuits involving AMPA/kainate receptors may therefore contribute to the robustness of odor representations against changes in stimulus intensity.

The dynamic reorganization of odor-evoked activity patterns during the first few hundred milliseconds of an odor response reduces the redundancy of activity patterns evoked by chemically related stimuli [1–3]. This decorrelation may promote odor discrimination [43] and prepare odor representations for further processing by auto-associative networks [44]. Recent results indicate that pattern decorrelation is caused, at least in part, by the “local sparsening” of mitral cell activity patterns in regions where glomerular input is dense and overlapping [35]. The most likely mechanism underlying this “local sparsening” is the spatially restricted inhibitory feedback from interneurons. Our pharmacological results are consistent with this hypothesis and indicate that ionotropic glutamate receptors in the mitral cell→interneuron→mitral cell and possibly other synaptic pathways participate in this process.

The oscillatory synchronization of odor-specific neuronal ensembles has been implicated in odor discrimination in insects [45] and affords the simultaneous transmission of different information from the olfactory bulb to higher brain regions in zebrafish [1]. Hence, the synchronization of neuronal ensembles by ionotropic glutamate receptor-containing circuits may contribute to the formatting of odor representations for read-out in higher brain regions. Together, our pharmacological analyses indicate that ionotropic glutamate receptors perform multiple functions during pattern processing in the olfactory bulb.

## MATERIALS AND METHODS

### Animals, preparation, pharmacological agents and odor stimulation

Zebrafish (*Danio rerio*) were kept at 26.5°C at a day/night rhythm of 13/11 hours. Experiments were performed in an explant of the intact brain and nose as described previously [2,3,25]. Briefly, adult zebrafish (>3 months old) were cold-anaesthetized, decapitated, and olfactory forebrain structures were exposed ventrally after removal of the eyes, jaws and palate. To optimize access of drugs, the dura mater over the ventro-lateral telencephalon close to the olfactory bulb was removed with fine forceps. Care was taken to avoid damage to the olfactory bulb. The preparation was then placed in a custom made flow-chamber, continuously superfused with teleost artificial cerebro-spinal fluid [46], and warmed up to room temperature (~22°C). All animal procedures were performed in accordance with the animal care guidelines issued by the Federal Republic of Germany.

Stock solutions of AP5 (10 mM in artificial cerebrospinal fluid) and NBQX (1 mM in DMSO; both from Tocris Bioscience, Bristol, UK) were kept frozen and diluted 1:100–1:200 in artificial cerebrospinal fluid immediately before the experiment, yielding final concentrations of 5–10 μM NBQX and 50–100 μM AP5. Solutions were applied through the bath. In pilot experiments, effects of different drug concentrations between 50–500 μM AP5 and 5–50 μM NBQX were compared but no qualitative differences observed, indicating that drugs penetrated well into the tissue and produced maximal effects at the concentration used in our experiments.

Odors were applied to the nasal epithelium through a constant perfusion stream using a computer-controlled, pneumatically actuated HPLC injection valve (Rheodyne, Rohnert Park, CA) as described previously [2,25]. The volume of the applied solution and the flow rate were adjusted to obtain a stimulus duration of ~2.4 s. Stock solutions of amino acids (Fluka, Neu-Ulm, Germany) were made in distilled water at a concentration of 1 mM, stored at –18°C, and diluted in fresh artificial cerebrospinal fluid to a final concentration of 10 μM immediately before the experiment. Extracts of commercially available dry fish food were prepared as described [25] and kept at –6°C for up to two weeks. Two hundred mg of dry food was suspended in 50 ml of artificial cerebrospinal fluid overnight, filtered through a filter paper and diluted 1:100 in artificial cerebrospinal fluid immediately before the experiment.

### Electrophysiological recordings

Electrophysiological recordings from mitral cells were performed in the ventro-lateral olfactory bulb where amino acid-responsive neurons are located [2,29]. Borosilicate patch pipettes (8–13 MΩ) were pulled on a P-2000 electrode puller (Sutter Instruments, Novato, CA) and filled with intracellular solution containing (in mM): 130 K-gluconate, 10 Na-gluconate, 10 Na-phosphocreatine, 4 NaCl, 4 Mg-ATP, 0.3 Na-GTP, 10 HEPES (pH 7.25; ~300

mosm). Cells in the olfactory bulb were visualized by differential interference contrast video microscopy or similar methods through a coverslip in the bottom of the chamber. Recorded neurons were selected for their large soma diameter ( $\sim 10 \mu\text{m}$ ) and a position close in the glomerular/mitral cell layer. Anatomical studies demonstrated that these are characteristics of mitral cells [32,34,37,47]. Membrane potential values were corrected for a junction potential of  $-13 \text{ mV}$ .

Recordings were performed using an Axoclamp 2B amplifier (Axon Instruments) and digitized at 10 kHz using National Instruments hardware and custom software written in IgorPro (Wavemetrics). To prevent early clogging of the glass capillary tip, a pressure of  $\sim 100 \text{ mbar}$  was applied to the pipette interior during penetration of the tissue and lowered to  $\sim 40 \text{ mbar}$  before a target cell was approached. After formation of a Giga-seal and break-in, intracellular whole-cell recordings were performed in current clamp mode ( $n = 16$  mitral cells). In most cells, a small negative holding current was applied to stabilize recordings.

When Giga-seal formation or break-in could not be achieved, pipette pressure was released and extracellular recordings were performed in the loose-patch or cell-attached mode ( $n = 14$  mitral cells). Two whole-cell recordings were lost during the experiment and continued as loose-patch recordings. Spontaneous firing rates of cells recorded in whole-cell mode ( $3.9 \pm 3.6 \text{ Hz}$ ; mean  $\pm$  standard deviation) were slightly lower than those recorded extracellularly ( $7.3 \pm 6.0 \text{ Hz}$ ), probably due to the holding current. When a recording was established, typically 2 food extracts and 6 amino acids were applied to select one or two stimuli that evoked a strong response in the recorded cell. These two stimuli were then applied 3–8 times (usually five times) at 2 min intervals in a pseudo-randomly interleaved sequence, followed by  $\sim 15 \text{ min}$  without odor stimulation to wash in drugs. The original stimulus sequence was then repeated. Completion of this stimulus protocol required continuous recordings for approximately 60 min. Recordings that were not stable up to this point, as judged by the measured resting potential and action potential amplitude, were excluded from the analysis. Drugs were then washed out for at least 30 min. When recordings were still stable, the stimulus sequence was repeated again. In total, responses of 30 neurons to 54 odor stimuli were measured before and during drug application, and 21 of these responses were tested again after wash-out.

To measure odor-evoked oscillatory activity in the local field potential, glass micropipettes were filled with artificial cerebrospinal fluid ( $8\text{--}13 \text{ M}\Omega$ ) and positioned in the glomerular/mitral cell layer. Recordings were made in bridge mode using an Axoclamp 2B amplifier (Axon Instruments) and band-pass filtered offline between  $8\text{--}43 \text{ Hz}$ . The position of the micropipette was optimized by small movements of the capillary tip while measuring oscillation amplitudes during stimulation with food extract.

## Two-photon $\text{Ca}^{2+}$ imaging

Two-photon  $\text{Ca}^{2+}$  imaging experiments were performed in transgenic fish expressing yellowameleon (YC) under the control of a fragment of the HuC promoter (HuC-YC) [33]. In the adult olfactory bulb, HuC-YC is expressed selectively in mitral cells [32]. HuC-YC-negative cells were collectively classified as interneurons and include periglomerular and granule cells. YC fluorescence did not change in response to odor stimulation and was exclusively used as an anatomical marker.

The red-fluorescent  $\text{Ca}^{2+}$  indicator, rhod-2-AM ester (Invitrogen/Molecular Probes), was injected into the olfactory bulb as described previously [34]. Briefly,  $50 \mu\text{g}$  of rhod-2-AM was dissolved in  $16 \mu\text{l}$  DMSO/pluronic acid (80/20) and this solution was diluted 1:10 in artificial cerebrospinal fluid before the

experiment. The dye solution was loaded into a patch pipette after gently breaking off the very tip and pressure-injected into the olfactory bulb under fluorescence optics. Injections were terminated when a predetermined fluorescence intensity level was reached to avoid excessive dye loading. To label mitral cells, multiple brief injections were made into the glomerular/mitral cell layer at different sites. To label interneurons, injections were made into the granule cell layer. For details see [34].

Fluorescence images were acquired using a custom-built 2-photon microscope [48] equipped with a  $20\times$  water immersion objective (NA 0.95; Olympus). Two-photon fluorescence was excited at  $830 \text{ nm}$  by a mode-locked Ti:Sapphire laser (Mira900; 76 MHz; Coherent, Santa Clara, CA) pumped by a 10 W diode laser (Verdi; Coherent). Fluorescence emission was detected externally by a photomultiplier-based whole-field detector in two wavelength channels ( $515/30 \text{ nm}$  and  $610/75 \text{ nm}$ ), allowing for the separate and simultaneous detection of HuC-YC and rhod-2 fluorescence, respectively. Image acquisition was controlled by custom software (CFNT; written by Ray Stepnoski at Bell Labs, Murry Hill, NJ, and Michael Müller at the Max-Planck-Institute for Medical Research, Heidelberg, Germany). Laser intensity was adjusted to minimize photobleaching.

To measure  $\text{Ca}^{2+}$  signals, series of images from a single focal plane were acquired at  $128 \text{ ms/frame}$  and  $128 \times 256$  pixels or  $256 \text{ ms/frame}$  and  $256 \times 256$  pixels. Previous experiments demonstrated that odor-evoked patterns of  $\text{Ca}^{2+}$  signals measured with this protocol are reproducible and stable over hours [35]. To verify the stability of responses, we repeated the first stimulus in the sequence at least once before the drug treatment was started, and typically multiple times during the initial phase of the experiment. When responses appeared not stable, experiments were discarded. Responses of interneurons were recorded in deep layers of the olfactory bulb that contain predominantly granule cells. The focal plane was kept constant during an experiment. Slow drift was corrected if necessary using natural landmarks in the raw fluorescence image and in the HuC-YC fluorescence image.

Image series of raw rhod-2 fluorescence were converted into image series representing the fractional change in pixel intensity relative to a pre-stimulus baseline ( $\Delta F/F$ ). Response maps were constructed by averaging  $\Delta F/F$  images during a period of 5s around response peak and mild spatial low-pass filtering using a Gaussian kernel (width, 5 pixels;  $\sigma$ , 1.2 pixels).

## Data analysis

Data were analyzed off-line using routines written in IgorPro (Wavemetrics) or Matlab (Mathworks). Trains of action potentials were described as series of delta functions and convolved with a Gaussian kernel ( $\sigma = 200 \text{ ms}$ ; other values gave similar results) to obtain firing rate functions. Firing rate functions from repeated stimulus applications were averaged, yielding peri-stimulus time histograms. Spontaneous firing rates were measured during two seconds before stimulus onset and averaged over all trials measured at a given condition (usually  $\geq 10$  trials). Effects of drugs on odor responses were assessed by subtracting peri-stimulus time histograms measured in the presence of a drug from corresponding peri-stimulus time histograms before drug application.

Mean response amplitudes of single neurons measured under different conditions were compared using a paired Student's *t*-test because measurements in repeated trials were approximately normally distributed. Mean responses across populations of neurons were usually not normally distributed and compared using a non-parametric sign test. To test for statistical differences between correlation strengths, correlation coefficients were transformed using the Fisher *Z* transform and compared using the *z* statistic.

## ACKNOWLEDGMENTS

We thank Winfried Denk for support, Thomas Oertner for comments on the manuscript, and members of the Friedrich lab for stimulating discussions.

## REFERENCES

- Friedrich RW, Habermann CJ, Laurent G (2004) Multiplexing using synchrony in the zebrafish olfactory bulb. *Nature Neurosci* 7: 862–871.
- Friedrich RW, Laurent G (2001) Dynamic optimization of odor representations in the olfactory bulb by slow temporal patterning of mitral cell activity. *Science* 291: 889–894.
- Friedrich RW, Laurent G (2004) Dynamics of olfactory bulb input and output activity during odor stimulation in zebrafish. *J Neurophysiol* 91: 2658–2669.
- Laurent G (2002) Olfactory network dynamics and the coding of multidimensional signals. *Nat Rev Neurosci* 3: 884–895.
- Kashiwadani H, Sasaki YF, Uchida N, Mori K (1999) Synchronized oscillatory discharges of mitral/tufted cells with different molecular receptive ranges in the rabbit olfactory bulb. *J Neurophysiol* 82: 1786–1792.
- Gray CM, Skinner JE (1988) Centrifugal regulation of neuronal activity in the olfactory bulb of the waking rabbit as revealed by reversible cryogenic blockade. *Exp Brain Res* 69: 378–386.
- Allison AC (1953) The morphology of the olfactory system in the vertebrates. *Biol Rev* 28: 195–244.
- Andres KH (1970) Anatomy and ultrastructure of the olfactory bulb in fish, amphibia, reptiles, birds and mammals. In: Wolstenholme GEW, Knight J, eds (1970) Ciba foundation symposium on taste and smell in vertebrates. London: Churchill Press. pp 177–196.
- Christie JM, Bark C, Hormuzdi SG, Helbig I, Monyer H, et al. (2005) Connexin36 mediates spike synchrony in olfactory bulb glomeruli. *Neuron* 46: 761–772.
- Urban NN, Sakmann B (2002) Reciprocal intraglomerular excitation and intra- and interglomerular lateral inhibition between mouse olfactory bulb mitral cells. *J Physiol* 542: 355–367.
- Schoppa NE, Westbrook GL (2002) AMPA autoreceptors drive correlated spiking in olfactory bulb glomeruli. *Nat Neurosci* 5: 1194–1202.
- Aroniadou-Anderjaska V, Ennis M, Shipley MT (1999) Dendrodendritic recurrent excitation in mitral cells of the rat olfactory bulb. *J Neurophysiol* 82: 489–494.
- Wachowiak M, Shipley MT (2006) Coding and synaptic processing of sensory information in the glomerular layer of the olfactory bulb. *Semin Cell Dev Biol* 17: 411–423.
- Shepherd GM, Chen WR, Greer CA (2004) Olfactory bulb. In: Shepherd GM, ed (2004) The synaptic organization of the brain. Oxford: Oxford University Press. pp 165–216.
- Isaacson JS, Strowbridge BW (1998) Olfactory reciprocal synapses: dendritic signaling in the CNS. *Neuron* 20: 749–761.
- Schoppa NE, Kinzie JM, Sahara Y, Segerson TP, Westbrook GL (1998) Dendrodendritic inhibition in the olfactory bulb is driven by NMDA receptors. *J Neurosci* 18: 6790–6802.
- Jahr CE, Nicoll RA (1982) An intracellular analysis of dendrodendritic inhibition in the turtle in vitro olfactory bulb. *J Physiol Lond* 326: 213–234.
- Halabisky B, Friedman D, Radojicic M, Strowbridge BW (2000) Calcium influx through NMDA receptors directly evokes GABA release in olfactory bulb granule cells. *J Neurosci* 20: 5124–5134.
- Isaacson JS (2001) Mechanisms governing dendritic gamma-aminobutyric acid (GABA) release in the rat olfactory bulb. *Proc Natl Acad Sci U S A* 98: 337–342.
- Chen WR, Xiong W, Shepherd GM (2000) Analysis of relations between NMDA receptors and GABA release at olfactory bulb reciprocal synapses. *Neuron* 25: 625–633.
- Egger V, Svoboda K, Mainen ZF (2005) Dendrodendritic synaptic signals in olfactory bulb granule cells: local spine boost and global low-threshold spike. *J Neurosci* 25: 3521–3530.
- Zelles T, Boyd JD, Hardy AB, Delaney KR (2006) Branch-specific Ca<sup>2+</sup> influx from Na<sup>+</sup>-dependent dendritic spikes in olfactory granule cells. *J Neurosci* 26: 30–40.
- Murphy GJ, Darcy DP, Isaacson JS (2005) Intraglomerular inhibition: signaling mechanisms of an olfactory microcircuit. *Nat Neurosci* 8: 354–364.
- Sassoe-Pognetto M, Ottersen OP (2000) Organization of ionotropic glutamate receptors at dendrodendritic synapses in the rat olfactory bulb. *J Neurosci* 20: 2192–2201.
- Tabor R, Yaksi E, Weislogel JM, Friedrich RW (2004) Processing of odor mixtures in the zebrafish olfactory bulb. *J Neurosci* 24: 6611–6620.
- Hamilton KA, Kauer JS (1989) Patterns of intracellular potentials in salamander mitral/tufted cells in response to odor stimulation. *J Neurophysiol* 62: 609–625.
- Chaput MA, Holley A (1985) Responses of olfactory bulb neurons to repeated odor stimulations in awake freely-breathing rabbits. *Physiol Behav* 34: 249–258.
- Duchamp-Viret P, Duchamp A (1997) Odor processing in the frog olfactory system. *Prog Neurobiol* 53: 561–602.
- Friedrich RW, Korsching SI (1997) Combinatorial and chemotopic odorant coding in the zebrafish olfactory bulb visualized by optical imaging. *Neuron* 18: 737–752.
- Berkowicz DA, Trombley PQ, Shepherd GM (1994) Evidence for glutamate as the olfactory receptor cell neurotransmitter. *J Neurophysiol* 71: 2557–2561.
- Ennis M, Zimmer LA, Shipley MT (1996) Olfactory nerve stimulation activates rat mitral cells via NMDA and non-NMDA receptors in vitro. *Neuroreport* 7: 989–992.
- Li J, Mack JA, Souren M, Yaksi E, Higashijima S, et al. (2005) Early development of functional spatial maps in the zebrafish olfactory bulb. *J Neurosci* 25: 5784–5795.
- Higashijima S, Masino MA, Mandel G, Fetcho JR (2003) Imaging neuronal activity during zebrafish behavior with a genetically encoded calcium indicator. *J Neurophysiol* 90: 3986–3997.
- Yaksi E, Friedrich RW (2006) Reconstruction of firing rate changes across neuronal populations by temporally deconvolved Ca<sup>2+</sup> imaging. *Nat Methods* 3: 377–383.
- Yaksi E, Judkewitz B, Friedrich RW (2007) Topological Reorganization of Odor Representations in the Olfactory Bulb. *PLoS Biol* 5: e178.
- Aroniadou-Anderjaska V, Ennis M, Shipley MT (1999) Current-source density analysis in the rat olfactory bulb: laminar distribution of kainate/AMPA- and NMDA-receptor-mediated currents. *J Neurophysiol* 81: 15–28.
- Edwards JG, Michel WC (2002) Odor-stimulated glutamatergic neurotransmission in the zebrafish olfactory bulb. *J Comp Neurol* 454: 294–309.
- Trombley PQ, Westbrook GL (1990) Excitatory synaptic transmission in cultures of rat olfactory bulb. *J Neurophysiol* 64: 598–606.
- Schoppa NE (2006) AMPA/kainate receptors drive rapid output and precise synchrony in olfactory bulb granule cells. *J Neurosci* 26: 12996–13006.
- Lagier S, Carleton A, Lledo PM (2004) Interplay between local GABAergic interneurons and relay neurons generates gamma oscillations in the rat olfactory bulb. *J Neurosci* 24: 4382–4392.
- Schoppa NE (2006) Synchronization of olfactory bulb mitral cells by precisely timed inhibitory inputs. *Neuron* 49: 271–283.
- Lagier S, Panzanelli P, Russo RE, Nissant A, Bathellier B, et al. (2007) GABAergic inhibition at dendrodendritic synapses tunes gamma oscillations in the olfactory bulb. *Proc Natl Acad Sci U S A* 104: 7259–7264.
- Rinberg D, Koulakov A, Gelperin A (2006) Speed-accuracy tradeoff in olfaction. *Neuron* 51: 351–358.
- Hasselmo ME, Wilson MA, Anderson BP, Bower JM (1990) Associative memory function in piriform (olfactory) cortex: computational modeling and neuropharmacology. *Cold Spring Harb Symp Quant Biol* 55: 599–610.
- Stopfer M, Bhagavan S, Smith BH, Laurent G (1997) Impaired odour discrimination on desynchronization of odour-encoding neural assemblies. *Nature* 390: 70–74.
- Mathieson WB, Maler L (1988) Morphological and electrophysiological properties of a novel in vitro preparation: the electrosensory lateral line lobe brain slice. *J Comp Physiol A* 163: 489–506.
- Fuller CL, Yettaw HK, Byrd CA (2006) Mitral cells in the olfactory bulb of adult zebrafish (*Danio rerio*): morphology and distribution. *J Comp Neurol* in press.
- Wachowiak M, Denk W, Friedrich RW (2004) Functional organization of sensory input to the olfactory bulb glomerulus analyzed by two-photon calcium imaging. *Proc Natl Acad Sci USA* 101: 9097–9102.
- Wachowiak M, McGann JP, Heyward PM, Shao Z, Puche AC, et al. (2005) Inhibition of olfactory receptor neuron input to olfactory bulb glomeruli mediated by suppression of presynaptic calcium influx. *J Neurophysiol*.
- Aroniadou-Anderjaska V, Zhou FM, Priest CA, Ennis M, Shipley MT (2000) Tonic and synaptically evoked presynaptic inhibition of sensory input to the rat olfactory bulb via GABA(B) heteroreceptors. *J Neurophysiol* 84: 1194–1203.
- Nickell WT, Behbehani MM, Shipley MT (1994) Evidence for GABAB-mediated inhibition of transmission from the olfactory nerve to mitral cells in the rat olfactory bulb. *Brain Res Bull* 35: 119–123.
- Wachowiak M, Cohen LB (1999) Presynaptic inhibition of primary olfactory afferents mediated by different mechanisms in lobster and turtle. *J Neurosci* 19: 8808–8817.
- Hsia AY, Vincent JD, Lledo PM (1999) Dopamine depresses synaptic inputs into the olfactory bulb. *J Neurophysiol* 82: 1082–1085.
- Aungst JL, Heyward PM, Puche AC, Karnup SV, Hayar A, et al. (2003) Centre-surround inhibition among olfactory bulb glomeruli. *Nature* 426: 623–629.
- Pressler RT, Strowbridge BW (2006) Blanes Cells Mediate Persistent Feedforward Inhibition onto Granule Cells in the Olfactory Bulb. *Neuron* 49: 889–904.
- Isaacson JS (1999) Glutamate spillover mediates excitatory transmission in the rat olfactory bulb. *Neuron* 23: 377–384.

## Author Contributions

Conceived and designed the experiments: RF. Performed the experiments: RT. Analyzed the data: RT. Contributed reagents/materials/analysis tools: RF. Wrote the paper: RF RT.



57. Didier A, Carleton A, Bjaalic JG, Vincent JD, Ottersen OP, et al. (2001) A dendrodendritic reciprocal synapse provides a recurrent excitatory connection in the olfactory bulb. *Proc Natl Acad Sci U S A* 98: 6441–6446.
58. Olsen SR, Bhandawat V, Wilson RI (2007) Excitatory interactions between olfactory processing channels in the *Drosophila* antennal lobe. *Neuron* 54: 89–103.
59. Shang Y, Claridge-Chang A, Sjulson L, Pypaert M, Miesenbock G (2007) Excitatory local circuits and their implications for olfactory processing in the fly antennal lobe. *Cell* 128: 601–612.
60. Root CM, Semmelhack JL, Wong AM, Flores J, Wang JW (2007) Propagation of olfactory information in *Drosophila*. *Proc Natl Acad Sci U S A* 104: 11826–11831.
